# Supplementary material for: Resolving multiple geological events using in situ Rb-Srgeochronology: implications for metallogenesis at Tropicana, WesternAustralia
Source: Copernicus journal article supplement (doi:10.5194/gchron-2020-7), 2020-03-31

TROPICANA GOLD MINE SAMPLES – BOSTON SHAKER PIT

BSD114-541-C

Core photograph

Automated mineralogy  
map and legend

Transmitted,  
plane-polarized light

Transmitted,  
cross-polarized light

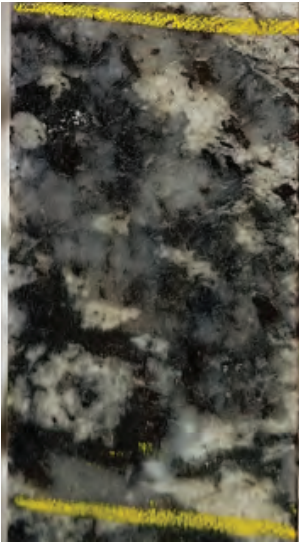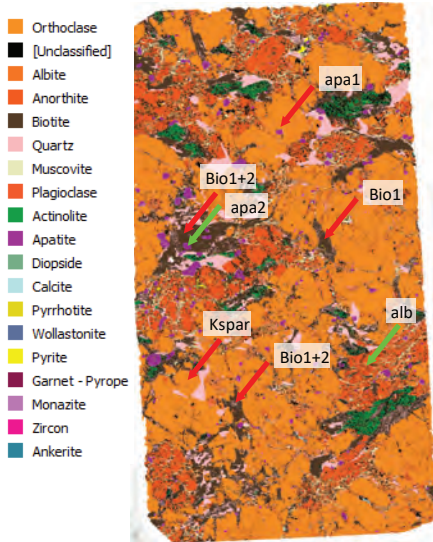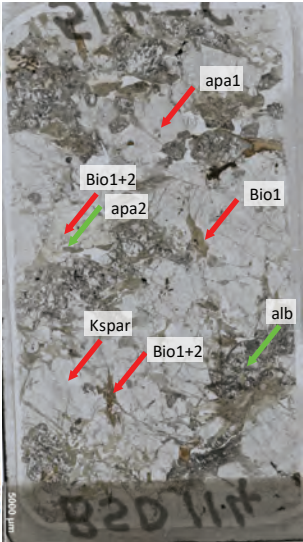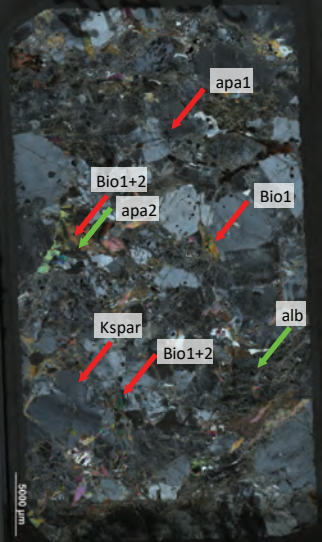

BSD114-546-F

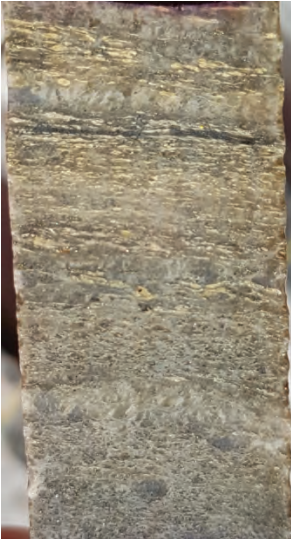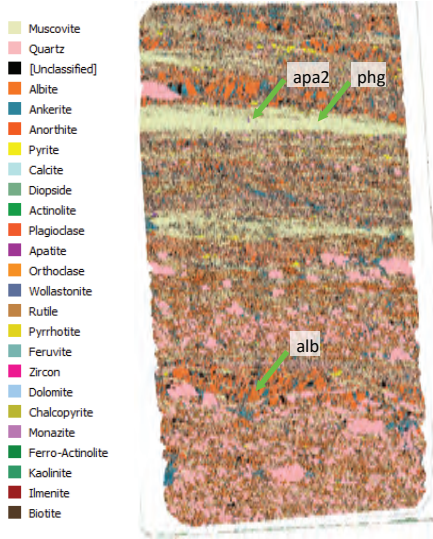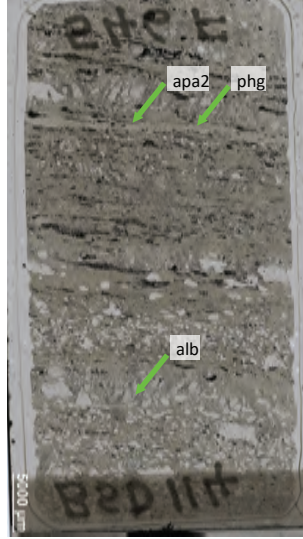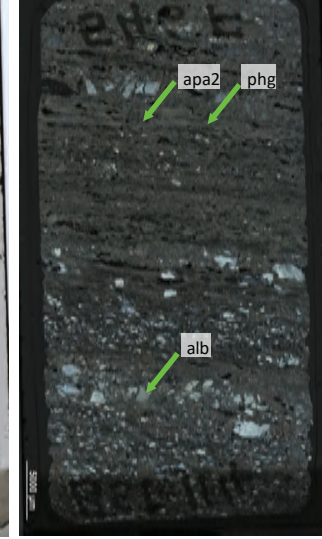

BSD132-316-C

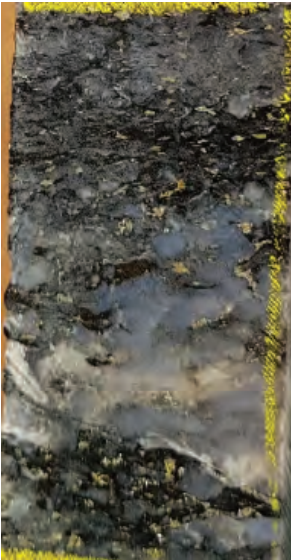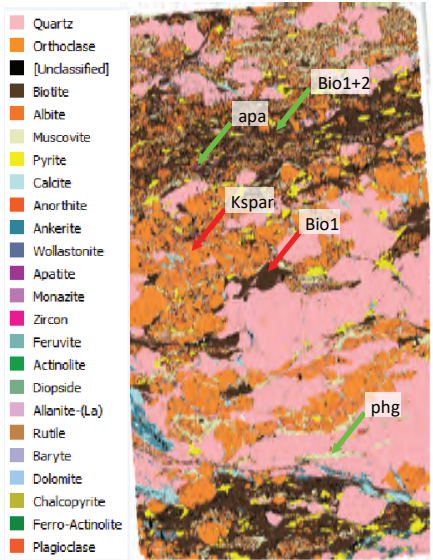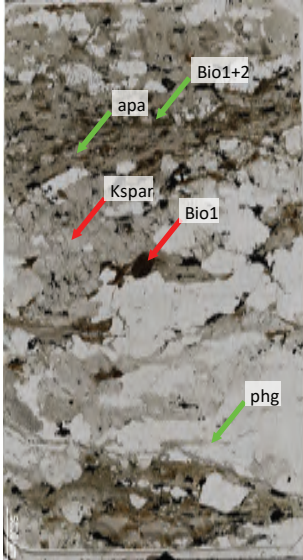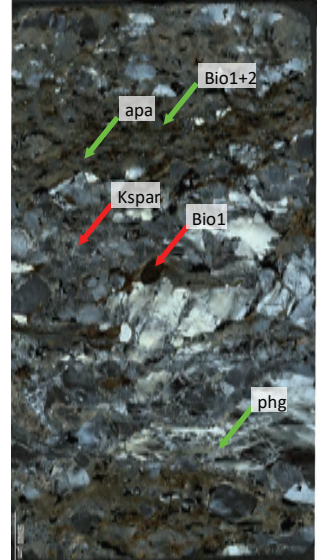

BSD132-322-F

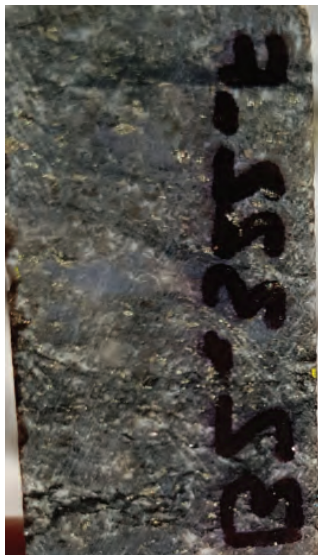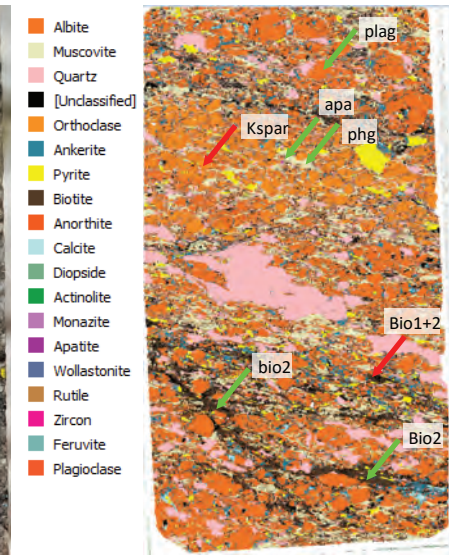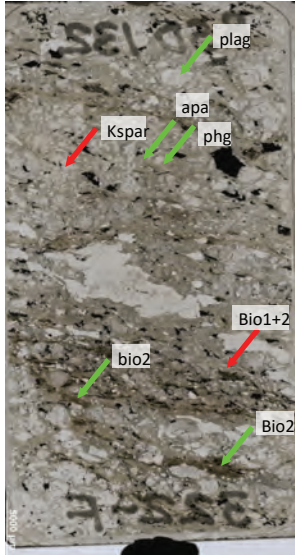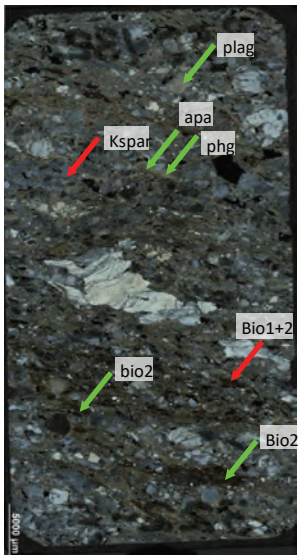



TROPICANA GOLD MINE SAMPLES – TROPICANA PIT

TPD542-371-C

Core photograph

Automated mineralogy  
map and legend

Transmitted,  
plane-polarized light

Transmitted,  
cross-polarized light

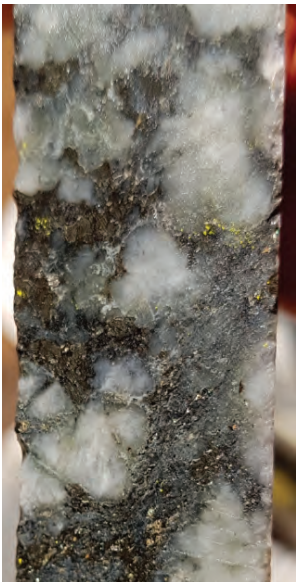

- Orthoclase
- Albite
- [Unclassified]
- Biotite
- Muscovite
- Quartz
- Apatite
- Anorthite
- Pyrite
- Diopside
- Calcite
- Monazite
- Titanite
- Wollastonite
- Allanite-(La)
- Rutile
- Zircon
- Plagioclase
- Hornblende
- Ferro-Actinolite
- Feruvite
- Schorl
- Ankerite
- Garnet - Pyrope

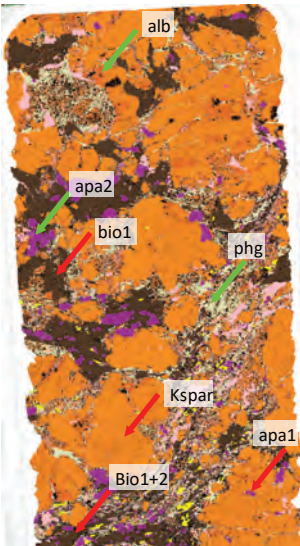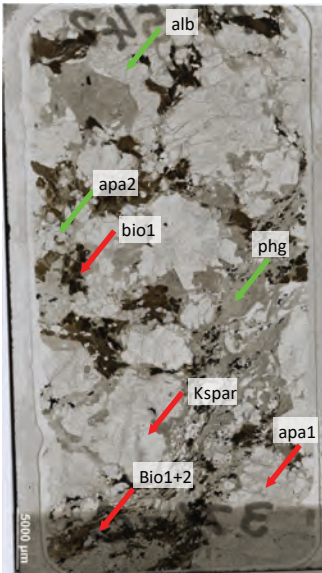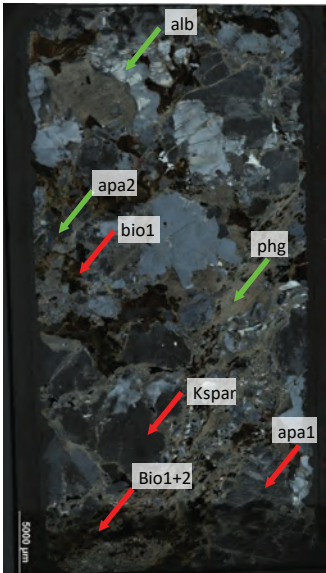

TPD542-357-F

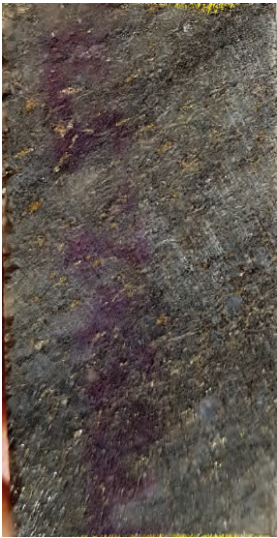

- Albite
- [Unclassified]
- Muscovite
- Biotite
- Anorthite
- Pyrite
- Quartz
- Orthoclase
- Calcite
- Apatite
- Diopside
- Plagioclase
- Wollastonite
- Monazite
- Rutile
- Allanite-(La)
- Kaolinite
- Titanite
- Zircon
- Baryte
- Ankerite
- Chalcopyrite

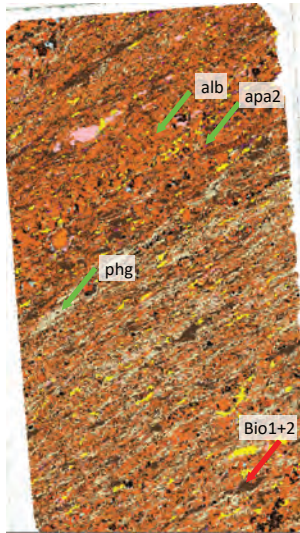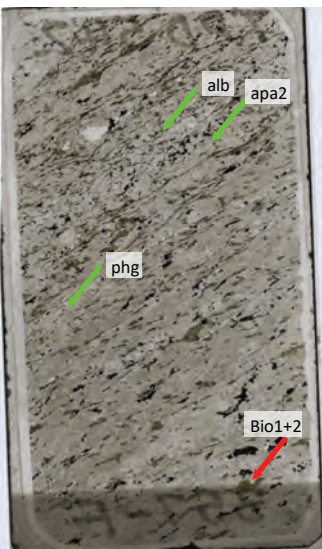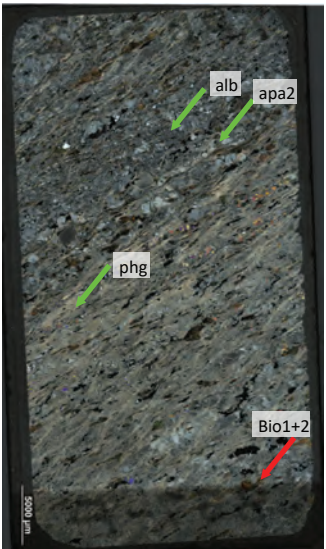

Olierook et al., Supplementary Table B continued



# TROPICANA GOLD MINE SAMPLES – HAVANA DEEP PIT

HDD077-422-C

Core photograph

Automated mineralogy map and legend

Transmitted, plane-polarized light

Transmitted, cross-polarized light

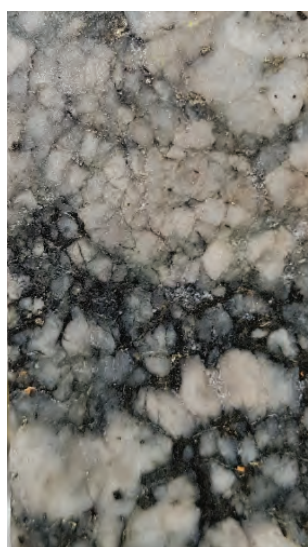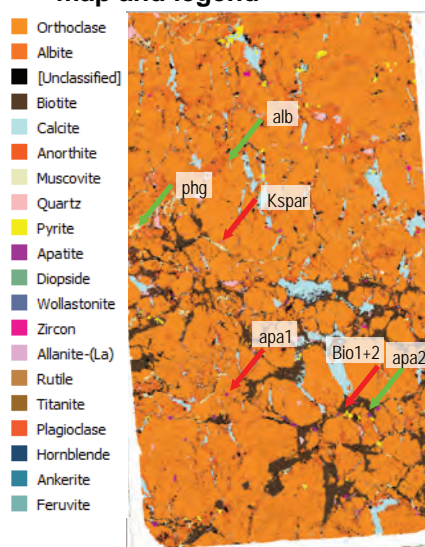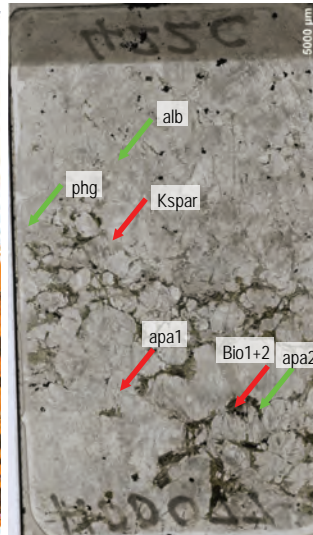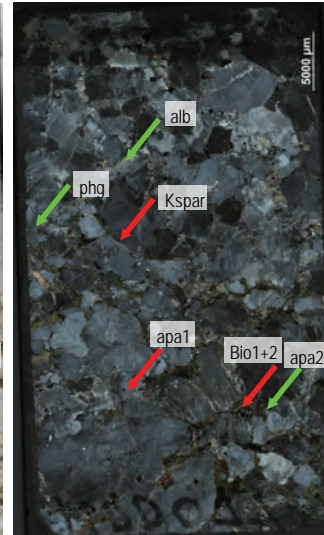

HDD254A-711-C

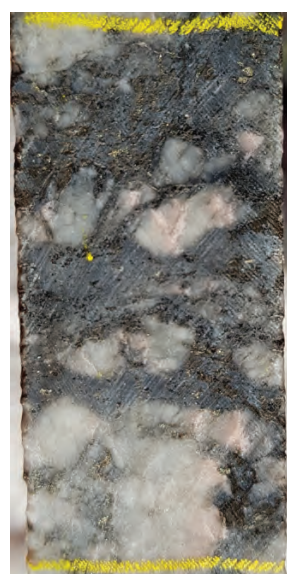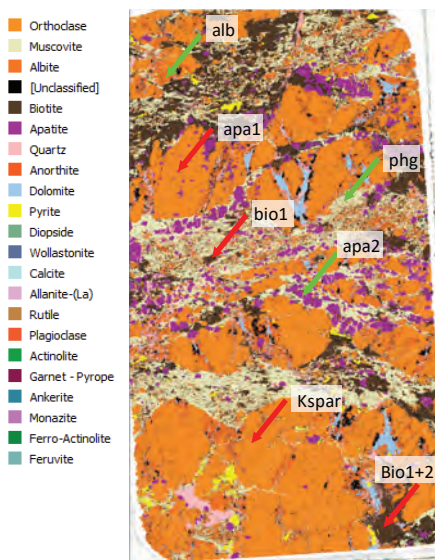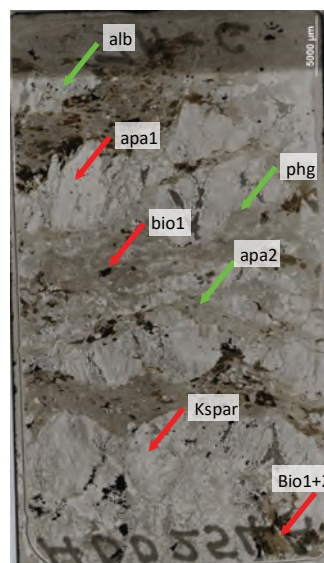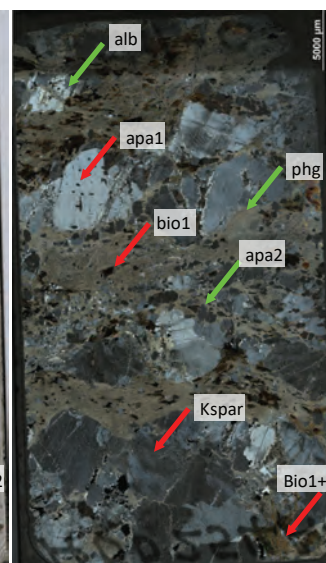

HDD254A-717-F

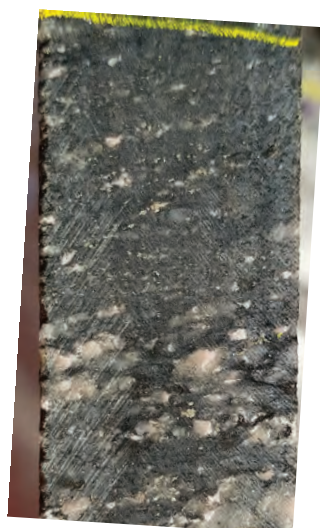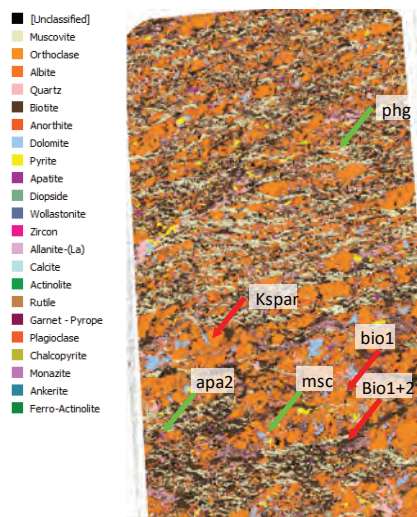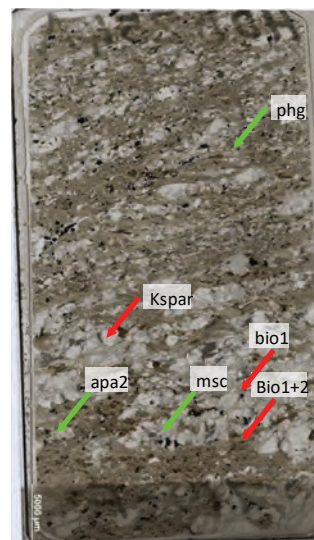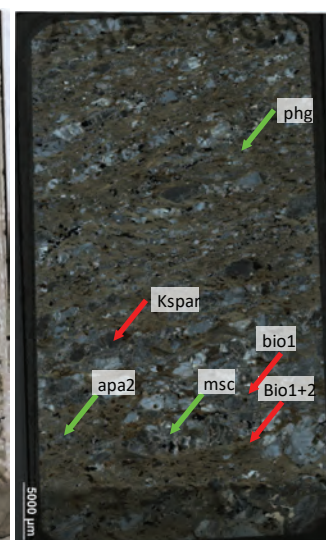



# SATELLITE DEPOSITS SAMPLES

Core photograph

Automated mineralogy map and legend

Transmitted, plane-polarized light

Transmitted, cross-polarized light

AERC012D-156-F

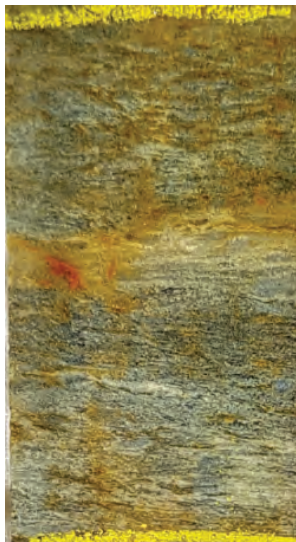

- Quartz
- Muscovite
- [Unclassified]
- Albite
- Anorthite
- Feruvite
- Pyrite
- Plagioclase
- Hematite/Magnetite
- Garnet - Pyrope
- Diopside
- Ilmenite
- Rutile
- Schorl
- Apatite
- Orthoclase
- Kaolinite
- Zircon
- Pyrrhotite
- Chalcopyrite
- Biotite

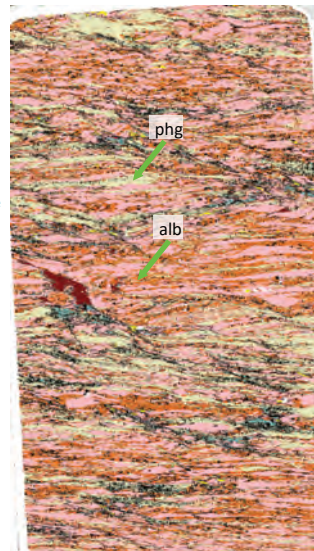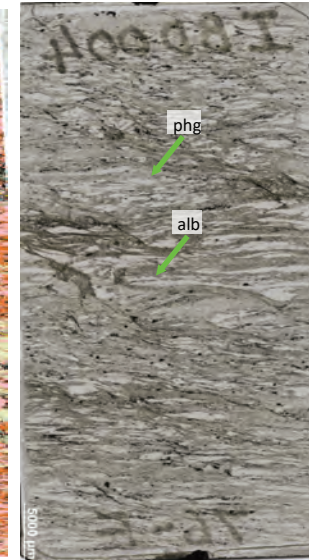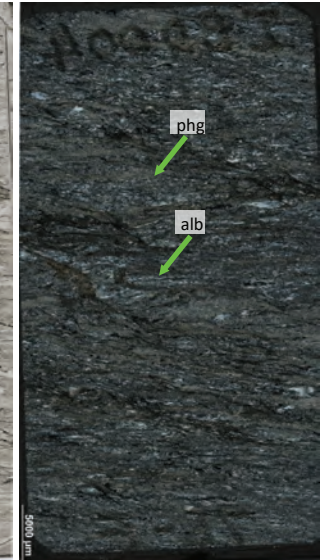

IBD004-76-F

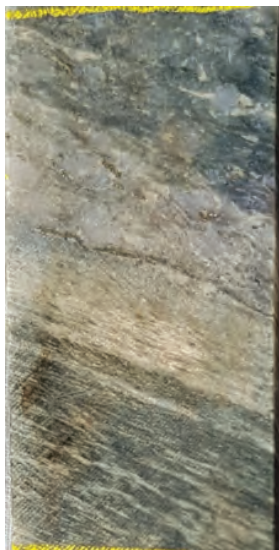

- Quartz
- Muscovite
- [Unclassified]
- Ankerite
- Anorthite
- Feruvite
- Dolomite
- Actinolite
- Pyrite
- Wollastonite
- Albite
- Diopside
- Rutile
- Schorl
- Chalcopyrite
- Orthoclase
- Plagioclase
- Garnet - Pyrope
- Apatite
- Zircon
- Biotite
- Sphalerite

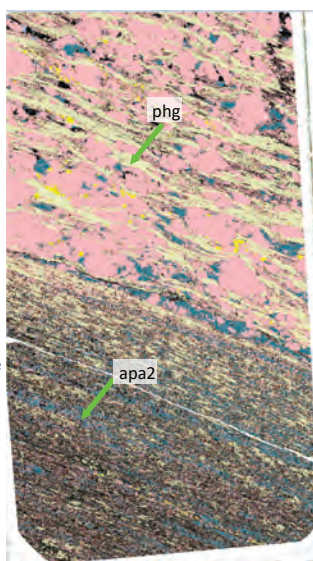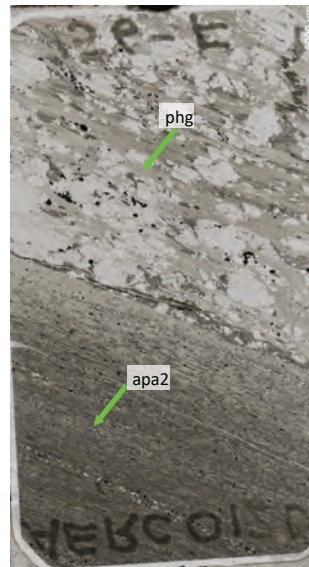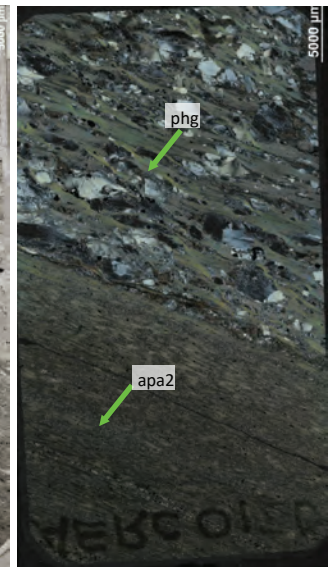

NZD021-159-F

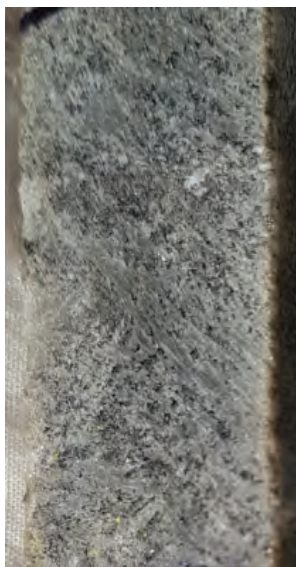

- Quartz
- Muscovite
- Ankerite
- [Unclassified]
- Calotte
- Pyrrhotite
- Diopside
- Albite
- Anorthite
- Apatite
- Actinolite
- Orthoclase
- Wollastonite
- Biotite
- Chalcopyrite
- Plagioclase
- Pyrite
- Zircon
- Ilmenite
- Ferro-Actinolite
- Feruvite
- Schorl

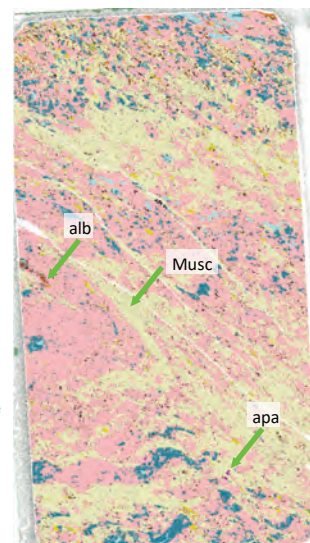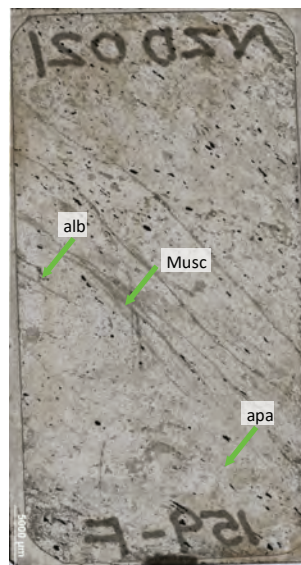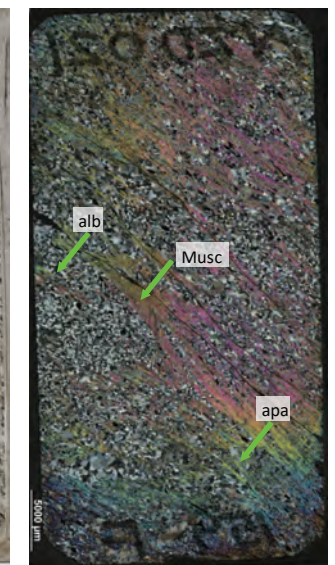

Supplement: Supplementary file 1 [file gchron-2020-7-supplement.zip]
