# Supplementary material for: Resolving multiple geological events using in situ Rb-Srgeochronology: implications for metallogenesis at Tropicana, WesternAustralia
Source: Copernicus journal article supplement (doi:10.5194/gchron-2020-7), 2020-03-31
Supplement: Supplementary file 1 [file Supp Table A_Acquisition Parameters Agilent QQQ8900.docx]

**Acquisition Parameters Agilent QQQ8900**

TRA mode

Reaction gas: N2O

Sampling Period per Cycle: 0.2050 sec

Acq Time per run: 99.8350 sec

| Element | Q1 -> Q2 | Dwell Time /Mass [ms] | Detector Mode |
| --- | --- | --- | --- |
| Ca | 43 -> 43 | 5 | Auto |
| Sr | 84 -> 100 | 20 | Auto |
| Rb | 85 -> 85 | 20 | Auto |
| Rb | 85 -> 101 | 5 | Auto |
| Sr | 86 -> 86 | 5 | Auto |
| Sr | 86 -> 102 | 50 | Auto |
| Rb | 87 -> 87 | 5 | Auto |
| Sr | 87 -> 103 | 50 | Auto |
| Sr | 88 -> 88 | 5 | Auto |
| Sr | 88 -> 104 | 5 | Auto |

| **Tune** | Custom Tune | |
| --- | --- | --- |
| Tune Mode | N2O |  |
| Scan Type | MS/MS |  |
| **Plasma** |  |  |
| RF Power | 1500 | W |
| RF Matching | 1.3 | V |
| Smpl Depth | 5 | mm |
| Nebulizer gas | 1 | l/min |
| Plasma Gas | 15 | l/min |
| Auxiliary Gas | 0.9 | l/min |
| **Lenses** |  |  |
| Extract 1 | -13 | V |
| Extract 2 | -250 | V |
| Omega Bias | -140 | V |
| Omega Lens | 6.5 | V |
| Q1 Entrance | -50 | V |
| Q1 Exit | 0 | V |
| Cell Focus | 0 | V |
| Cell Entrance | -51 | V |
| Cell Exit | -60 | V |
| Deflect | 6.4 | V |
| Plate Bias | -61 | V |
| Q1 |  |  |
| Q1 Bias | -0.1 | V |
| Q1 Prefilter Bias | -10.1 | V |
| Q1 Postfilter Bias | -10 | V |
| **Cell** |  |  |
| use gas | Yes |  |
| 4th Gas Flow | On |  |
| 4th Gas Flow Rate | 25% |  |
| OctP Bias | -3.0 | V |
| Axial Acceleration | 0.5 | V |
| OctP RF | 180 | V |
| Energy Discrimination | -7.0 | V |
| Wait Time Offset | 2 | msec |
