# Supplementary material for: Resolving multiple geological events using in situ Rb-Srgeochronology: implications for metallogenesis at Tropicana, WesternAustralia
Source: Copernicus journal article supplement (doi:10.5194/gchron-2020-7), 2020-03-31
Supplement: Supplementary file 2 [file Supplementary Table B_Rb-Sr data_v3.xlsx]

## Sheet: Unknowns
#	Run	Date	Sample	Assemblage	Mineral	Spot	84Sr/86Sr	± 2σ	Sr/Ca	± 2σ	87Rb/86Sr	± 2σ (prop)	87Sr/86Sr	± 2σ
1	1	2019-11-07	BSD 114-541-C	1	Apatite	541-C-apa1 - 2	0.05407	0.00038	0.001812	1.4e-05	0.000454	3.5e-05	0.7034	0.0018
2	1	2019-11-07	BSD 114-541-C	1	Apatite	541-C-apa1 - 1	0.05367	0.00032	0.002171	1.9e-05	0.00134	0.00012	0.7038	0.0022
3	1	2019-11-07	BSD 114-541-C	1	Apatite	541-C-apa1 - 3	0.05391	0.00032	0.00214	1.9e-05	0.00025	2.8e-05	0.705	0.002
4	1	2019-11-07	BSD 114-541-C	1	Apatite	541-C-apa1 - 5	0.05401	0.00032	0.003274	3.2e-05	0.001084	4.6e-05	0.7069	0.002
5	3	2019-11-13	BSD 114-541-C	1	Biotite	541-C-bio1 - 1	0.0544	0.0041	-0.00109	0.00051	154.217	7.83746	6.484	0.1
6	3	2019-11-13	BSD 114-541-C	1	Biotite	541-C-bio1 - 9	0.0509	0.0053	-0.00111	0.00038	243.496	12.6742	9.88	0.2
7	3	2019-11-13	BSD 114-541-C	1	Biotite	541-C-bio1 - 2	0.0496	0.0046	-0.00062	0.00026	244.223	12.5393	9.52	0.17
8	3	2019-11-13	BSD 114-541-C	1	Biotite	541-C-bio1trans - 17	0.0557	0.0058	0.00092	0.00034	249.037	13.4337	9.98	0.22
9	3	2019-11-13	BSD 114-541-C	1	Biotite	541-C-bio1trans - 3	0.0507	0.006	-0.00069	0.00031	250.671	12.9226	10.13	0.19
10	1	2019-11-07	BSD 114-541-C	1	Biotite	541-C-bio1 - 9	0.0502	0.0048	0.0006	0.0015	250.777	8.63695	9.71	0.16
11	1	2019-11-07	BSD 114-541-C	1	Biotite	541-C-bio1trans - 2	0.0492	0.0041	-0.00049	0.00089	251.788	8.49871	9.97	0.14
12	3	2019-11-13	BSD 114-541-C	1	Biotite	541-C-bio1trans - 2	0.0524	0.0053	-0.00102	0.00029	255.576	13.1259	10.08	0.17
13	1	2019-11-07	BSD 114-541-C	1	Biotite	541-C-bio1trans - 3	0.0492	0.0038	0.00137	0.00095	261.441	8.92496	10.33	0.17
14	3	2019-11-13	BSD 114-541-C	1	Biotite	541-C-bio1trans - 4	0.0519	0.0057	-0.00038	0.00028	263.841	13.6788	10.43	0.21
15	1	2019-11-07	BSD 114-541-C	1	Biotite	541-C-bio1trans - 1	0.0496	0.0041	0.00063	0.00078	267.14	9.24957	10.47	0.17
16	1	2019-11-07	BSD 114-541-C	1	Biotite	541-C-bio1trans - 4	0.0506	0.004	0.00039	0.00094	268.059	9.0645	10.24	0.16
17	3	2019-11-13	BSD 114-541-C	1	Biotite	541-C-bio1trans - 18	0.0527	0.0061	0.00013	0.00027	282.732	14.7646	10.79	0.21
18	3	2019-11-13	BSD 114-541-C	1	Biotite	541-C-bio1trans - 15	0.0507	0.0062	-0.00109	0.00032	284.094	14.9539	10.99	0.23
19	1	2019-11-07	BSD 114-541-C	1	Biotite	541-C-bio1trans - 15	0.0495	0.0039	0.0008	0.00077	294.81	10.2531	11.32	0.18
20	3	2019-11-13	BSD 114-541-C	1	Biotite	541-C-bio1trans - 12	0.0517	0.0083	-0.00099	0.00043	297.899	17.2277	11.94	0.38
21	1	2019-11-07	BSD 114-541-C	1	Biotite	541-C-bio1 - 10	0.0525	0.0042	9e-05	0.00059	308.231	11.0235	12.15	0.23
22	1	2019-11-07	BSD 114-541-C	1	Biotite	541-C-bio1trans - 8	0.0502	0.0039	5e-05	0.00078	309.243	10.473	11.32	0.17
23	1	2019-11-07	BSD 114-541-C	1	Biotite	541-C-bio1trans - 5	0.05	0.0041	-0.0003	0.00082	312.276	10.7212	11.55	0.19
24	1	2019-11-07	BSD 114-541-C	1	Biotite	541-C-bio1trans - 6	0.0505	0.004	0.00159	0.00089	312.368	10.5988	11.83	0.18
25	3	2019-11-13	BSD 114-541-C	1	Biotite	541-C-bio1 - 12	0.0554	0.006	-0.00077	0.00021	317.608	16.4155	12.25	0.22
26	3	2019-11-13	BSD 114-541-C	1	Biotite	541-C-bio1 - 10	0.0557	0.006	-0.0005	0.00022	318.607	16.5192	12.34	0.23
27	3	2019-11-13	BSD 114-541-C	1	Biotite	541-C-bio1trans - 7	0.0533	0.0064	-0.00024	0.00027	320.514	16.8206	12.44	0.25
28	1	2019-11-07	BSD 114-541-C	1	Biotite	541-C-bio1trans - 12	0.0552	0.0043	0.0011	0.00079	323.951	11.079	12.36	0.2
29	1	2019-11-07	BSD 114-541-C	1	Biotite	541-C-bio1trans - 17	0.0521	0.0042	-0.00011	0.00064	326.157	11.9809	12.2	0.24
30	1	2019-11-07	BSD 114-541-C	1	Biotite	541-C-bio1trans - 14	0.0508	0.0045	-0.00021	0.00055	327.812	13.2581	12.9	0.34
31	1	2019-11-07	BSD 114-541-C	1	Biotite	541-C-bio1 - 13	0.0508	0.0046	-0.00049	0.00072	334.798	11.7648	12.83	0.24
32	1	2019-11-07	BSD 114-541-C	1	Biotite	541-C-bio1trans - 13	0.0515	0.0041	0.00015	0.00076	337.556	11.6592	12.91	0.23
33	1	2019-11-07	BSD 114-541-C	1	Biotite	541-C-bio1trans - 18	0.0499	0.0042	0.00029	0.0007	357.596	12.2841	13.32	0.23
34	3	2019-11-13	BSD 114-541-C	1	Biotite	541-C-bio1trans - 13	0.054	0.007	-0.00091	0.00022	360.567	18.6764	13.95	0.27
35	3	2019-11-13	BSD 114-541-C	1	Biotite	541-C-bio1 - 4	0.0517	0.0055	-0.00045	0.0002	364.2	19.1498	13.32	0.26
36	3	2019-11-13	BSD 114-541-C	1	Biotite	541-C-bio1 - 8	0.0506	0.0063	-0.00064	0.0002	406.887	22.352	14.49	0.36
37	1	2019-11-07	BSD 114-541-C	1	Biotite	541-C-bio1 - 5	0.0504	0.0047	0.00228	0.0007	428.932	15.1191	16.21	0.28
38	3	2019-11-13	BSD 114-541-C	1	Biotite	541-C-bio1 - 5	0.0509	0.0066	-0.00048	0.00015	429.774	22.3053	15.51	0.3
39	1	2019-11-07	BSD 114-541-C	1	Biotite	541-C-bio1 - 14	0.0482	0.0054	0.00032	0.00056	494.568	18.1316	18.3	0.38
40	1	2019-11-07	BSD 114-541-C	1	Biotite	541-C-bio1 - 15	0.051	0.0062	0.00013	0.0005	502.841	18.8635	18.38	0.39
41	1	2019-11-07	BSD 114-541-C	1	Biotite	541-C-bio1 - 7	0.0531	0.0061	-0.00018	0.0004	608.557	24.2315	21.81	0.62
42	1	2019-11-07	BSD 114-541-C	1	Biotite	541-C-bio1 - 1	0.056	0.0032	0.001	0.0014	179.901	5.8686	6.826	0.077
43	1	2019-11-07	BSD 114-541-C	1	Biotite	541-C-bio1 - 2	0.0525	0.0034	0.00204	0.00085	217.408	7.13276	7.86	0.11
44	1	2019-11-07	BSD 114-541-C	1	Biotite	541-C-bio1trans - 19	0.0522	0.0044	0.00069	0.00049	270.266	13.0343	9.65	0.35
45	1	2019-11-07	BSD 114-541-C	1	Biotite	541-C-bio1trans - 9	0.0502	0.004	-0.00047	0.00083	301.153	10.0172	10.93	0.16
46	1	2019-11-07	BSD 114-541-C	1	Biotite	541-C-bio1trans - 16	0.0516	0.0037	0.00285	0.00086	308.967	11.1401	11.07	0.21
47	1	2019-11-07	BSD 114-541-C	1	Biotite	541-C-bio1trans - 10	0.0494	0.0038	-0.00034	0.00075	329.467	11.1875	12.1	0.18
48	1	2019-11-07	BSD 114-541-C	1	Biotite	541-C-bio1 - 4	0.0505	0.0045	0.00059	0.00052	444.559	15.7624	14.64	0.26
49	1	2019-11-07	BSD 114-541-C	1	Biotite	541-C-bio1 - 16	0.0549	0.0056	0.00046	0.00063	447.685	16.4347	14.79	0.32
50	3	2019-11-13	BSD 114-541-C	1	Biotite	541-C-bio1 - 11	0.0538	0.0074	-0.00063	0.00016	487.719	26.3289	14.05	0.35
51	1	2019-11-07	BSD 114-541-C	1	Biotite	541-C-bio1 - 8	0.0544	0.0058	7e-05	0.00051	528.581	19.5043	18.51	0.4
52	3	2019-11-13	BSD 114-541-C	1	Biotite	541-C-bio1 - 6	0.0504	0.0077	-0.00042	0.00013	537.672	30.6025	16.3	0.57
53	3	2019-11-13	BSD 114-541-C	1	Biotite	541-C-bio1 - 7	0.0487	0.0082	-0.00012	0.00014	617.596	34.4726	19.21	0.6
54	3	2019-11-13	BSD 114-541-C	1 or 2	Biotite	541-C-bio1-2 - 2	0.0553	0.0024	0.0108	0.0037	13.242	0.664839	1.0547	0.014
55	3	2019-11-13	BSD 114-541-C	1 or 2	Biotite	541-C-bio1-2 - 1 - 1	0.055	0.0028	0.0031	0.0017	22.9782	1.98687	1.315	0.049
56	1	2019-11-07	BSD 114-541-C	1 or 2	Biotite	541-C-bio1-2 - 3	0.0547	0.0027	0.006	0.0023	85.0325	7.79611	3.15	0.22
57	1	2019-11-07	BSD 114-541-C	1 or 2	Biotite	541-C-bio1-2 - 1	0.0513	0.006	-0.00027	0.00037	327.904	13.382	8.48	0.21
58	3	2019-11-13	BSD 114-541-C	1 or 2	Biotite	541-C-bio1-2 - 1_1	0.053	0.015	3e-05	0.00013	501.343	32.3006	11.08	0.95
59	1	2019-11-07	BSD 114-541-C	1 or 2	Biotite	541-C-bio2 - 1	0.0545	0.0013	0.0126	0.0066	14.4509	0.55594	1.033	0.013
60	3	2019-11-13	BSD 114-541-C	1 or 2	Biotite	541-C-bio2 - 6	0.0531	0.002	0.0043	0.0022	16.2936	0.827495	1.036	0.015
61	1	2019-11-07	BSD 114-541-C	1 or 2	Biotite	541-C-bio2 - 5	0.0511	0.0039	0.00054	0.0006	171.26	6.37818	4.87	0.11
62	3	2019-11-13	BSD 114-541-C	2	Apatite	541-C-apa2 - 1	0.05326	0.00049	0.002215	3.5e-05	0.00329	0.00022	0.7035	0.0068
63	1	2019-11-07	BSD 114-541-C	2	Apatite	541-C-apa2 - 5	0.05371	0.00037	0.001911	1.4e-05	0.00061	0.00013	0.7036	0.0021
64	1	2019-11-07	BSD 114-541-C	2	Apatite	541-C-apa2 - 1	0.05427	0.0005	0.002048	2.5e-05	0.0069	0.0017	0.7044	0.0023
65	1	2019-11-07	BSD 114-541-C	2	Apatite	541-C-apa2 - 7	0.05348	0.00037	0.002061	1.5e-05	0.001044	9.9e-05	0.7047	0.002
66	1	2019-11-07	BSD 114-541-C	2	Apatite	541-C-apa2 - 2	0.0548	0.00086	0.002043	3.5e-05	0.01125	0.00055	0.7055	0.0041
67	1	2019-11-07	BSD 114-541-C	2	Apatite	541-C-apa2 - 4	0.0541	0.00031	0.002687	2e-05	0.00017	1.8e-05	0.7066	0.0016
68	3	2019-11-13	BSD 114-541-C	2	Apatite	541-C-apa2 - 5	0.05385	0.00049	0.002072	3.1e-05	0.00184	0.00019	0.7083	0.0067
69	3	2019-11-13	BSD 114-541-C	2	Apatite	541-C-apa2 - 6	0.05451	0.00047	0.002893	5.9e-05	0.000205	3.5e-05	0.7094	0.0068
70	3	2019-11-13	BSD 114-541-C	2	Apatite	541-C-apa2 - 2	0.0556	0.00084	0.002164	5.3e-05	0.000244	9.6e-05	0.7107	0.0071
71	1	2019-11-07	BSD 114-541-C	2	Biotite	541-C-bio2 - 9	0.0534	0.0017	0.000626	1.3e-05	9.15594	0.32884	0.8701	0.008
72	3	2019-11-13	BSD 114-541-C	2	Biotite	541-C-bio2 - 9	0.055	0.0025	0.000852	5.7e-05	10.7262	0.544422	0.8964	0.013
73	1	2019-11-07	BSD 114-541-C	2	Biotite	541-C-bio2 - 8	0.0535	0.0012	0.01	0.0058	36.7708	1.28173	1.322	0.013
74	3	2019-11-13	BSD 114-541-C	2	Biotite	541-C-bio2 - 8	0.0525	0.0057	0.00072	0.00075	280.643	32.1695	5.43	0.45
75	3	2019-11-13	BSD 114-541-C	2	Phengite	541-C-phg - 4	0.0541	0.00057	0.01725	0.00073	0.291633	0.0151181	0.7109	0.0071
76	3	2019-11-13	BSD 114-541-C	2	Phengite	541-C-phg - 5	0.05358	0.00078	0.023	0.0022	1.04083	0.0549123	0.7238	0.0076
77	3	2019-11-13	BSD 114-541-C	2	Phengite	541-C-phg - 7	0.05395	0.0007	0.0228	0.002	1.13165	0.0574785	0.7233	0.0074
78	3	2019-11-13	HDD 077-422-C	1	Apatite	422-C-apa1 - 2	0.05377	0.00034	0.003815	5.1e-05	-2e-06	1.4e-05	0.7019	0.0066
79	1	2019-11-07	HDD 077-422-C	1	Apatite	422-C-apa1 - 1	0.05376	0.0004	0.002215	1.9e-05	6.8e-05	1.7e-05	0.7048	0.0022
80	1	2019-11-07	HDD 077-422-C	1	Apatite	422-C-apa1 - 5	0.05394	0.00029	0.004079	3.8e-05	0.00219	0.00011	0.7068	0.0019
81	1	2019-11-07	HDD 077-422-C	1	Biotite	422-C-bio1 - 3	0.05365	0.00057	0.00507	0.00011	7.85976	0.31322	0.8558	0.005
82	3	2019-11-13	HDD 077-422-C	1	Biotite	422-C-bio1 - 3	0.0545	0.0014	0.00507	0.00036	13.1693	0.926497	0.985	0.019
83	3	2019-11-13	HDD 077-422-C	1	Biotite	422-C-bio1 - 1	0.0531	0.0018	0.00383	0.0005	30.9252	1.64734	1.345	0.022
84	3	2019-11-13	HDD 077-422-C	1	Biotite	422-C-bio1 - 2	0.0524	0.0021	0.00375	0.00067	36.42	3.03587	1.492	0.058
85	3	2019-11-13	HDD 077-422-C	1	Biotite	422-C-bio1 - 5	0.0533	0.0018	0.0069	0.0012	39.5988	2.72478	1.418	0.035
86	1	2019-11-07	HDD 077-422-C	1	Biotite	422-C-bio1 - 1	0.0541	0.0014	0.002132	6.7e-05	43.4539	1.42236	1.578	0.013
87	3	2019-11-13	HDD 077-422-C	1	Biotite	422-C-bio1 - 4	0.0525	0.0018	0.00261	0.00028	48.9354	2.4828	1.77	0.025
88	1	2019-11-07	HDD 077-422-C	1	Biotite	422-C-bio1 - 2	0.054	0.0013	0.002368	9e-05	49.0891	1.754	1.808	0.023
89	1	2019-11-07	HDD 077-422-C	1	Biotite	422-C-bio1 - 9	0.054	0.0017	0.00731	0.00064	50.468	3.1566	1.593	0.047
90	1	2019-11-07	HDD 077-422-C	1	Biotite	422-C-bio1 - 4	0.0528	0.0013	0.00271	0.0001	53.2258	1.86238	1.83	0.024
91	1	2019-11-07	HDD 077-422-C	1	Biotite	422-C-bio1 - 10	0.0521	0.0014	0.001822	5e-05	54.9816	1.77052	1.817	0.014
92	3	2019-11-13	HDD 077-422-C	1	Biotite	422-C-bio1 - 6	0.0535	0.0023	0.00219	0.00016	57.2185	3.04964	2.075	0.04
93	1	2019-11-07	HDD 077-422-C	1	Biotite	422-C-bio1 - 6	0.0531	0.0014	0.001968	5.9e-05	63.2734	2.00803	2.3	0.018
94	3	2019-11-13	HDD 077-422-C	1	Biotite	422-C-bio1 - 10	0.053	0.0023	0.00252	0.00049	76.3821	3.81647	2.32	0.029
95	1	2019-11-07	HDD 077-422-C	1	Biotite	422-C-bio1 - 5	0.0548	0.0018	0.001971	8.4e-05	78.1472	2.50315	2.133	0.019
96	1	2019-11-07	HDD 077-422-C	1	Biotite	422-C-bio1 - 8	0.0535	0.0018	0.0022	0.0001	88.7096	3.07418	2.41	0.032
97	1	2019-11-07	HDD 077-422-C	1	Biotite	422-C-bio1 - 7	0.0535	0.0017	0.001829	6.6e-05	97.6265	3.13821	2.999	0.03
98	3	2019-11-13	HDD 077-422-C	1	Biotite	422-C-bio1 - 7	0.0523	0.0034	0.00332	0.00078	111.803	5.78666	3.095	0.049
99	3	2019-11-13	HDD 077-422-C	2	Biotite	422-C-bio2 - 5	0.0582	0.0019	0.00282	0.00024	15.4308	0.78654	0.9798	0.012
100	1	2019-11-07	HDD 077-422-C	2	Biotite	422-C-bio2 - 3	0.0545	0.001	0.0425	0.0055	19.6448	0.687791	1.0349	0.0091
101	3	2019-11-13	HDD 077-422-C	2	Biotite	422-C-bio2 - 1	0.0544	0.002	0.00206	0.00012	23.4959	1.36907	1.112	0.015
102	3	2019-11-13	HDD 077-422-C	2	Biotite	422-C-bio2 - 16	0.0541	0.0018	0.00268	0.00067	31.788	2.07272	1.286	0.03
103	3	2019-11-13	HDD 077-422-C	2	Biotite	422-C-bio2 - 11	0.0547	0.0025	0.0131	0.0035	38.2365	3.38493	1.371	0.056
104	3	2019-11-13	HDD 077-422-C	2	Biotite	422-C-bio2 - 9	0.0537	0.002	0.006	0.0012	40.2437	2.0291	1.391	0.019
105	1	2019-11-07	HDD 077-422-C	2	Biotite	422-C-bio2 - 1	0.0543	0.0018	0.00585	0.00043	42.075	1.53447	1.417	0.017
106	3	2019-11-13	HDD 077-422-C	2	Biotite	422-C-bio2 - 10	0.0523	0.0021	0.00223	0.00022	49.1443	2.52994	1.562	0.025
107	1	2019-11-07	HDD 077-422-C	2	Biotite	422-C-bio2 - 9	0.055	0.0029	0.0005	0.0048	55.1103	1.80632	1.676	0.019
108	1	2019-11-07	HDD 077-422-C	2	Biotite	422-C-bio2 - 5	0.0532	0.0018	0.0154	0.0048	57.3625	5.34884	1.659	0.087
109	1	2019-11-07	HDD 077-422-C	2	Biotite	422-C-bio2 - 11	0.0533	0.0015	-0.0032	0.0044	69.5612	2.27273	1.849	0.019
110	1	2019-11-07	HDD 077-422-C	2	Biotite	422-C-bio2 - 4	0.0541	0.002	0.0073	0.002	74.7367	2.70845	1.961	0.029
111	3	2019-11-13	HDD 077-422-C	2	Biotite	422-C-bio2 - 12	0.051	0.0026	0.0046	0.0011	89.0973	4.81276	2.201	0.042
112	1	2019-11-07	HDD 077-422-C	2	Biotite	422-C-bio2 - 10	0.0529	0.0017	0.001794	7.4e-05	95.4203	3.53858	2.42	0.043
113	3	2019-11-13	HDD 077-422-C	2	Biotite	422-C-bio2 - 4	0.0511	0.0036	0.0042	0.0014	120.704	8.17875	2.79	0.11
114	3	2019-11-13	HDD 077-422-C	2	Biotite	422-C-bio2 - 14	0.0493	0.0037	0.00125	0.00058	189.82	16.5109	3.89	0.25
115	1	2019-11-07	HDD 077-422-C	2	Biotite	422-C-bio2 - 2	0.0529	0.0033	0.0004	0.0015	196.356	6.58095	4.161	0.064
116	1	2019-11-07	HDD 077-422-C	2	Biotite	422-C-bio2 - 12	0.0528	0.003	-0.0028	0.0019	249.122	17.3693	4.84	0.25
117	1	2019-11-07	HDD 077-422-C	2	Biotite	422-C-bio2 - 13	0.051	0.0029	-0.006	0.0015	291.225	10.4872	5.58	0.11
118	3	2019-11-13	HDD 077-422-C	2	Biotite	422-C-bio2 - 6	0.0482	0.005	0.00101	0.00043	346.944	20.2352	6.91	0.22
119	1	2019-11-07	HDD 077-422-C	2	Biotite	422-C-bio2 - 15	0.0528	0.004	-2e-05	0.00073	480.779	20.7457	8.62	0.25
120	1	2019-11-07	HDD 077-422-C	2	Biotite	422-C-bio2 - 6	0.0506	0.0055	-0.00021	0.00068	752.883	51.357	13.36	0.83
121	1	2019-11-07	HDD 077-422-C	2	Biotite	422-C-bio2 - 14	0.0575	0.0056	-0.00172	0.00049	789.654	40.1574	13.9	0.57
122	3	2019-11-13	HDD 077-422-C	2	Biotite	422-C-bio2 - 2	0.0482	0.0097	4e-05	0.00012	808.324	48.6885	14.74	0.96
123	3	2019-11-13	HDD 077-422-C	2	Biotite	422-C-bio2 - 15	0.0492	0.0067	0.00023	0.00013	875.533	51.4185	15.44	0.56
124	3	2019-11-13	HDD 077-422-C	2	Biotite	422-C-bio2 - 8	0.0474	0.0079	0.00043	0.00017	949.1	55.4401	17	0.66
125	3	2019-11-13	HDD 077-422-C	2	Phengite	422-C-phg - 1	0.055	0.0015	0.098	0.055	5.11333	0.270409	0.799	0.013
126	1	2019-11-07	HDD 077-422-C	2	Phengite	422-C-phg - 2	0.0535	0.001	0.0335	0.0071	6.7594	0.214716	0.8388	0.0048
127	1	2019-11-07	HDD 077-422-C	2	Phengite	422-C-phg - 4	0.053	0.0011	-0.007	0.016	8.35341	0.265669	0.8764	0.0055
128	3	2019-11-13	HDD 077-422-C	2	Phengite	422-C-phg - 9	0.0535	0.0015	0.0242	0.0043	8.9279	0.468199	0.8634	0.011
129	1	2019-11-07	HDD 077-422-C	2	Phengite	422-C-phg - 8	0.0535	0.0012	-0.0194	0.0099	12.7962	0.407323	0.9487	0.0073
130	3	2019-11-13	HDD 077-422-C	2	Phengite	422-C-phg - 12	0.0534	0.002	0.0135	0.0031	13.687	0.732707	0.977	0.014
131	3	2019-11-13	HDD 077-422-C	2	Phengite	422-C-phg - 7	0.0528	0.0016	0.0114	0.0025	17.3563	0.892655	1.0019	0.012
132	1	2019-11-07	HDD 077-422-C	2	Phengite	422-C-phg - 6	0.0533	0.0014	-0.059	0.016	19.461	0.63197	1.0746	0.0078
133	3	2019-11-13	HDD 077-422-C	2	Phengite	422-C-phg - 4	0.0553	0.0021	0.0451	0.0097	20.6077	1.04414	1.078	0.015
134	3	2019-11-13	HDD 077-422-C	2	Phengite	422-C-phg - 5	0.0534	0.002	0.0154	0.0034	20.635	1.04117	1.0522	0.013
135	1	2019-11-07	HDD 077-422-C	2	Phengite	422-C-phg - 1	0.0537	0.0016	-0.0227	0.0089	22.3842	0.705541	1.1071	0.0099
136	3	2019-11-13	HDD 077-422-C	2	Phengite	422-C-phg - 10	0.0539	0.0018	0.0241	0.0042	22.4151	1.11495	1.0849	0.013
137	1	2019-11-07	HDD 077-422-C	2	Phengite	422-C-phg - 3	0.0549	0.0015	-0.063	0.014	26.3371	0.822271	1.1841	0.0092
138	3	2019-11-13	HDD 077-422-C	2	Phengite	422-C-phg - 3	0.0522	0.0027	0.0131	0.0033	31.4611	1.57312	1.2312	0.015
139	3	2019-11-13	HDD 254-711-C	1	Apatite	711-C-apa1 - 9	0.0539	0.00027	0.00425	5.5e-05	0.000108	1.8e-05	0.7002	0.0066
140	3	2019-11-13	HDD 254-711-C	1	Apatite	711-C-apa1 - 7	0.05324	0.00027	0.00778	0.00011	4.93e-05	7.7e-06	0.7007	0.0066
141	3	2019-11-13	HDD 254-711-C	1	Apatite	711-C-apa1 - 8	0.05375	0.00021	0.006583	7.4e-05	0.000176	2.2e-05	0.70113	0.0065
142	3	2019-11-13	HDD 254-711-C	1	Apatite	711-C-apa1 - 6	0.05393	0.00022	0.007792	7.6e-05	2.08e-05	4.8e-06	0.7048	0.0067
143	1	2019-11-07	HDD 254-711-C	1	Apatite	711-C-apa1 - 8	0.054	0.00021	0.00336	2e-05	0.000131	1.4e-05	0.7049	0.0013
144	3	2019-11-13	HDD 254-711-C	1	Apatite	711-C-apa1 - 4	0.05433	0.00024	0.006241	8.4e-05	3.8e-05	8.9e-06	0.7069	0.0066
145	3	2019-11-13	HDD 254-711-C	1	Biotite	711-C-bio1 - 4	0.0528	0.0031	0.0048	0.0011	100.932	5.02982	2.5	0.033
146	1	2019-11-07	HDD 254-711-C	1	Biotite	711-C-bio1 - 10	0.0551	0.0022	-0.0032	0.0026	106.424	3.34029	3.53	0.028
147	3	2019-11-13	HDD 254-711-C	1	Biotite	711-C-bio1 - 18	0.0537	0.0045	0.0046	0.0017	109.26	5.58679	3.464	0.061
148	3	2019-11-13	HDD 254-711-C	1	Biotite	711-C-bio1 - 17	0.0512	0.0038	0.0028	0.0015	109.896	12.1634	3.38	0.26
149	3	2019-11-13	HDD 254-711-C	1	Biotite	711-C-bio1 - 12	0.0501	0.0033	0.0037	0.001	115.527	5.79864	3.639	0.049
150	1	2019-11-07	HDD 254-711-C	1	Biotite	711-C-bio1 - 18	0.0548	0.0028	-0.0065	0.0034	116.839	3.78124	3.68	0.044
151	3	2019-11-13	HDD 254-711-C	1	Biotite	711-C-bio1 - 11	0.0532	0.0032	0.0062	0.0013	118.433	5.90511	3.612	0.047
152	3	2019-11-13	HDD 254-711-C	1	Biotite	711-C-bio1 - 5	0.0558	0.0036	0.0085	0.0021	118.524	6.02562	3.743	0.062
153	3	2019-11-13	HDD 254-711-C	1	Biotite	711-C-bio1 - 8	0.0534	0.0033	0.00369	0.00085	125.154	6.28032	3.922	0.055
154	1	2019-11-07	HDD 254-711-C	1	Biotite	711-C-bio1 - 14	0.0538	0.0028	-0.0074	0.0033	128.146	4.13618	4.097	0.046
155	1	2019-11-07	HDD 254-711-C	1	Biotite	711-C-bio1 - 6	0.0542	0.0024	-0.0042	0.0021	128.79	4.07144	3.913	0.05
156	1	2019-11-07	HDD 254-711-C	1	Biotite	711-C-bio1 - 19	0.0503	0.0025	-0.006	0.0026	129.893	4.28509	3.693	0.049
157	3	2019-11-13	HDD 254-711-C	1	Biotite	711-C-bio1 - 14	0.0556	0.0039	0.0055	0.0015	131.784	6.65758	3.833	0.06
158	1	2019-11-07	HDD 254-711-C	1	Biotite	711-C-bio1 - 5	0.0529	0.003	-0.0162	0.0044	133.11	4.3094	3.983	0.051
159	1	2019-11-07	HDD 254-711-C	1	Biotite	711-C-bio1 - 11	0.0509	0.0022	-0.0078	0.0023	134.489	4.2635	3.837	0.034
160	3	2019-11-13	HDD 254-711-C	1	Biotite	711-C-bio1 - 2	0.0494	0.0036	0.0048	0.0009	134.509	6.76782	3.301	0.051
161	3	2019-11-13	HDD 254-711-C	1	Biotite	711-C-bio1 - 7	0.0531	0.0039	0.0032	0.00094	134.69	6.75764	4.638	0.07
162	3	2019-11-13	HDD 254-711-C	1	Biotite	711-C-bio1 - 10	0.0534	0.0033	0.00137	0.00053	136.87	7.25694	3.433	0.061
163	3	2019-11-13	HDD 254-711-C	1	Biotite	711-C-bio1 - 3	0.0506	0.0035	0.00391	0.00098	137.688	6.92047	3.629	0.054
164	1	2019-11-07	HDD 254-711-C	1	Biotite	711-C-bio1 - 4	0.0525	0.0025	-0.0079	0.0023	139.913	4.44789	3.381	0.037
165	3	2019-11-13	HDD 254-711-C	1	Biotite	711-C-bio1 - 6	0.0508	0.0034	0.0028	0.0007	140.866	7.07327	4.185	0.058
166	1	2019-11-07	HDD 254-711-C	1	Biotite	711-C-bio1 - 7	0.052	0.0021	-0.0009	0.0019	141.2	4.51263	4.307	0.039
167	1	2019-11-07	HDD 254-711-C	1	Biotite	711-C-bio1 - 12	0.0496	0.0024	-0.006	0.0022	142.119	4.56804	4.04	0.038
168	1	2019-11-07	HDD 254-711-C	1	Biotite	711-C-bio1 - 8	0.053	0.0025	-0.0001	0.0019	143.682	4.64322	4.479	0.046
169	1	2019-11-07	HDD 254-711-C	1	Biotite	711-C-bio1 - 2	0.0516	0.0027	-0.0039	0.0017	148.646	4.70291	3.97	0.042
170	1	2019-11-07	HDD 254-711-C	1	Biotite	711-C-bio1 - 3	0.0514	0.0024	-0.0024	0.0017	150.117	4.82806	3.966	0.041
171	1	2019-11-07	HDD 254-711-C	1	Biotite	711-C-bio1 - 20	0.0551	0.0028	-0.0022	0.0021	153.702	5.02562	4.676	0.05
172	3	2019-11-13	HDD 254-711-C	1	Biotite	711-C-bio1 - 20	0.0525	0.004	0.0071	0.0019	154.217	7.91131	4.518	0.084
173	1	2019-11-07	HDD 254-711-C	1	Biotite	711-C-bio1 - 9	0.0536	0.0028	-0.0015	0.0018	156.92	5.05372	4.546	0.055
174	1	2019-11-07	HDD 254-711-C	1	Biotite	711-C-bio1 - 15	0.0551	0.004	-0.0022	0.0029	168.686	5.78419	5.028	0.083
175	3	2019-11-13	HDD 254-711-C	1	Biotite	711-C-bio1 - 13	0.049	0.0034	0.00144	0.00058	170.566	8.61672	4.927	0.076
176	1	2019-11-07	HDD 254-711-C	1	Biotite	711-C-bio1 - 16	0.0549	0.0051	-0.002	0.0026	173.65	5.96063	4.675	0.089
177	1	2019-11-07	HDD 254-711-C	1	Biotite	711-C-bio1 - 1	0.0538	0.0028	-0.0067	0.0019	175.305	5.77285	4.821	0.067
178	1	2019-11-07	HDD 254-711-C	1	Biotite	711-C-bio1 - 13	0.0515	0.0024	-0.0045	0.0018	177.052	5.69284	5.128	0.054
179	3	2019-11-13	HDD 254-711-C	1	Biotite	711-C-bio1 - 15	0.0547	0.0061	0.0028	0.0012	180.556	9.62251	5.56	0.14
180	3	2019-11-13	HDD 254-711-C	1	Biotite	711-C-bio1 - 16	0.0526	0.0055	0.00118	0.0008	181.646	9.47547	5.309	0.11
181	1	2019-11-07	HDD 254-711-C	1	Biotite	711-C-bio1 - 17	0.051	0.0036	-0.0026	0.0022	182.751	6.08996	5.288	0.077
182	3	2019-11-13	HDD 254-711-C	1	Biotite	711-C-bio1 - 1	0.0526	0.005	0.0033	0.0012	183.099	9.60481	4.695	0.096
183	3	2019-11-13	HDD 254-711-C	1	Biotite	711-C-bio1 - 19	0.0519	0.0052	0.0038	0.001	206.531	10.5326	5.271	0.096
184	3	2019-11-13	HDD 254-711-C	2	Apatite	711-C-apa2 - 11	0.05347	0.00033	0.004079	6.5e-05	7.3e-05	2.1e-05	0.7042	0.0066
185	3	2019-11-13	HDD 254-711-C	2	Apatite	711-C-apa2 - 14	0.05386	0.00036	0.003939	6.8e-05	4.4e-05	1.6e-05	0.7056	0.0067
186	2	2019-11-12	HDD254-711-C	2	Apatite	711-C-apa2 - 11	0.05423	0.00033	0.003872	4.8e-05	3.70326e-06	1.38873e-05	0.7057	0.0016
187	1	2019-11-07	HDD 254-711-C	2	Apatite	711-C-apa2 - 6	0.05406	0.00023	0.004409	3e-05	0.000146	2.4e-05	0.7063	0.0016
188	1	2019-11-07	HDD 254-711-C	2	Apatite	711-C-apa2 - 12	0.0541	0.0002	0.003906	2.6e-05	0.000631	4.7e-05	0.7063	0.0015
189	1	2019-11-07	HDD 254-711-C	2	Apatite	711-C-apa2 - 11	0.05401	0.00022	0.004256	2.7e-05	5.06e-05	8.6e-06	0.7066	0.0015
190	2	2019-11-12	HDD254-711-C	2	Apatite	711-C-apa2 - 17	0.05407	0.00026	0.004583	5.3e-05	0.000173127	4.63426e-05	0.7067	0.0017
191	2	2019-11-12	HDD254-711-C	2	Apatite	711-C-apa2 - 2	0.05378	0.00032	0.004895	7.4e-05	1.11098e-05	1.29622e-05	0.7068	0.002
192	1	2019-11-07	HDD 254-711-C	2	Apatite	711-C-apa2 - 1	0.05396	0.00021	0.004344	2.4e-05	0.000103	1.4e-05	0.7069	0.0014
193	2	2019-11-12	HDD254-711-C	2	Apatite	711-C-apa2 - 15	0.05428	0.00025	0.00471	5.4e-05	0.000137946	2.41345e-05	0.7071	0.0015
194	2	2019-11-12	HDD254-711-C	2	Apatite	711-C-apa2 - 20	0.0544	0.00033	0.004405	5.3e-05	0.00218492	0.000223912	0.7073	0.0014
195	1	2019-11-07	HDD 254-711-C	2	Apatite	711-C-apa2 - 5	0.0542	0.00025	0.003756	2.9e-05	0.000111	1.6e-05	0.7074	0.0016
196	2	2019-11-12	HDD254-711-C	2	Apatite	711-C-apa2 - 10	0.05394	0.00027	0.005952	8.3e-05	2.59228e-05	9.26396e-06	0.7075	0.0018
197	2	2019-11-12	HDD254-711-C	2	Apatite	711-C-apa2 - 6	0.05405	0.00029	0.00684	0.00011	0.000336071	2.90142e-05	0.7081	0.0017
198	2	2019-11-12	HDD254-711-C	2	Apatite	711-C-apa2 - 12	0.05419	0.00025	0.004804	5.9e-05	4.90682e-05	1.20516e-05	0.7081	0.0016
199	2	2019-11-12	HDD254-711-C	2	Apatite	711-C-apa2 - 18	0.05417	0.00023	0.006046	7.2e-05	2.23121e-05	9.07738e-06	0.7081	0.0013
200	2	2019-11-12	HDD254-711-C	2	Apatite	711-C-apa2 - 14	0.05402	0.00023	0.005044	5.8e-05	6.01779e-05	1.7607e-05	0.7082	0.0014
201	2	2019-11-12	HDD254-711-C	2	Apatite	711-C-apa2 - 3	0.05409	0.00028	0.00658	0.00011	0.000150908	1.7694e-05	0.7083	0.0021
202	2	2019-11-12	HDD254-711-C	2	Apatite	711-C-apa2 - 19	0.05425	0.00023	0.005926	6.7e-05	3.79584e-05	1.01953e-05	0.7084	0.0014
203	2	2019-11-12	HDD254-711-C	2	Apatite	711-C-apa2 - 1	0.05385	0.0003	0.005744	8.5e-05	0.000250896	2.15295e-05	0.7085	0.0019
204	2	2019-11-12	HDD254-711-C	2	Apatite	711-C-apa2 - 8	0.05438	0.00035	0.005985	9.1e-05	2.12937e-05	1.20386e-05	0.7085	0.002
205	2	2019-11-12	HDD254-711-C	2	Apatite	711-C-apa2 - 9	0.05441	0.00036	0.005778	8.7e-05	8.70265e-05	1.39309e-05	0.7089	0.0019
206	2	2019-11-12	HDD254-711-C	2	Apatite	711-C-apa2 - 16	0.05429	0.00021	0.007281	8.9e-05	1.45353e-05	6.94605e-06	0.7091	0.0013
207	3	2019-11-13	HDD 254-711-C	2	Apatite	711-C-apa2 - 6	0.0537	0.00019	0.007256	8.9e-05	9.3e-05	1.2e-05	0.7092	0.0066
208	3	2019-11-13	HDD 254-711-C	2	Apatite	711-C-apa2 - 9	0.05385	0.00028	0.005732	8e-05	6.2e-05	1.3e-05	0.7093	0.0067
209	3	2019-11-13	HDD 254-711-C	2	Apatite	711-C-apa2 - 1	0.05498	0.00024	0.005125	7.6e-05	0.000739	7.8e-05	0.7103	0.0066
210	3	2019-11-13	HDD 254-711-C	2	Apatite	711-C-apa2 - 13	0.05474	0.00037	0.003223	4.2e-05	8.7e-05	2.3e-05	0.7111	0.0067
211	2	2019-11-12	HDD254-711-C	2	Biotite	711-C-bio2 - 8	0.0553	0.0026	0.0024	0.0018	14.0168	0.849734	0.947	0.0096
212	2	2019-11-12	HDD254-711-C	2	Biotite	711-C-bio2 - 5	0.055	0.0027	0.0011	0.0013	26.4227	1.62078	1.165	0.014
213	2	2019-11-12	HDD254-711-C	2	Biotite	711-C-bio2 - 16	0.0516	0.0024	0.00023	0.00091	26.9875	1.67935	1.152	0.016
214	2	2019-11-12	HDD254-711-C	2	Biotite	711-C-bio2 - 17	0.0543	0.0027	-0.00033	0.00079	39.1157	2.3844	1.345	0.017
215	2	2019-11-12	HDD254-711-C	2	Biotite	711-C-bio2 - 6	0.0521	0.003	0.00049	0.00066	55.1785	3.63213	1.629	0.031
216	2	2019-11-12	HDD254-711-C	2	Biotite	711-C-bio2 - 14	0.0515	0.0039	0.0006	0.0011	63.4183	4.23752	1.756	0.042
217	1	2019-11-07	HDD 254-711-C	2	Biotite	711-C-bio2 - 4	0.0537	0.0025	-0.0084	0.004	89.537	7.15763	2.24	0.11
218	2	2019-11-12	HDD254-711-C	2	Biotite	711-C-bio2 - 15	0.0517	0.0032	0.00026	0.0005	105.45	6.84743	2.444	0.048
219	2	2019-11-12	HDD254-711-C	2	Biotite	711-C-bio2 - 12	0.0497	0.0035	7e-05	0.00057	124.8	7.79712	2.872	0.055
220	2	2019-11-12	HDD254-711-C	2	Biotite	711-C-bio2 - 7	0.0536	0.0045	0.00019	0.00051	145.723	9.99419	3.063	0.096
221	2	2019-11-12	HDD254-711-C	2	Biotite	711-C-bio2 - 10	0.0556	0.0047	-0.00017	0.00034	152.667	9.61397	3.258	0.067
222	3	2019-11-13	HDD 254-711-C	2	Biotite	711-C-bio2 - 9	0.055	0.0045	0.00121	0.00045	162.846	8.29403	3.484	0.06
223	3	2019-11-13	HDD 254-711-C	2	Biotite	711-C-bio2 - 6	0.0509	0.0043	0.00311	0.0007	163.209	8.50016	3.437	0.068
224	3	2019-11-13	HDD 254-711-C	2	Biotite	711-C-bio2 - 1	0.0493	0.0053	0.0087	0.002	188.458	9.82132	4	0.082
225	1	2019-11-07	HDD 254-711-C	2	Biotite	711-C-bio2 - 6	0.0525	0.0042	-0.0035	0.0013	193.874	7.76978	4.11	0.11
226	3	2019-11-13	HDD 254-711-C	2	Biotite	711-C-bio2 - 2	0.0471	0.0054	0.00255	0.00075	196.268	10.3719	4.196	0.1
227	2	2019-11-12	HDD254-711-C	2	Biotite	711-C-bio2 - 4	0.0503	0.0052	-0.00013	0.00046	202.938	12.7468	4.152	0.083
228	3	2019-11-13	HDD 254-711-C	2	Biotite	711-C-bio2 - 4	0.057	0.0059	0.00137	0.00046	219.973	11.6558	4.564	0.11
229	1	2019-11-07	HDD 254-711-C	2	Biotite	711-C-bio2 - 1	0.0496	0.0044	-0.0024	0.0011	272.564	10.1161	5.31	0.12
230	2	2019-11-12	HDD254-711-C	2	Biotite	711-C-bio2 - 11	0.0489	0.0074	-0.00018	0.00019	298.112	22.1138	5.67	0.25
231	2	2019-11-12	HDD254-711-C	2	Biotite	711-C-bio2 - 18	0.047	0.0049	-9e-05	0.00022	303.667	20.9001	5.78	0.17
232	2	2019-11-12	HDD254-711-C	2	Biotite	711-C-bio2 - 9	0.0465	0.0048	4e-05	0.0002	306.352	20.4453	5.74	0.17
233	1	2019-11-07	HDD 254-711-C	2	Biotite	711-C-bio2 - 2	0.0532	0.0049	-0.0032	0.0011	319.171	11.1694	6.02	0.11
234	3	2019-11-13	HDD 254-711-C	2	Biotite	711-C-bio2 - 7	0.0562	0.0074	0.00103	0.00031	319.697	18.1467	6.34	0.2
235	1	2019-11-07	HDD 254-711-C	2	Biotite	711-C-bio2 - 3	0.0525	0.0053	-0.00193	0.0007	445.846	19.3445	8.31	0.27
236	3	2019-11-13	HDD 254-711-C	2	Biotite	711-C-bio2 - 3	0.0552	0.0099	0.00048	0.0002	588.533	34.1526	10.85	0.41
237	3	2019-11-13	HDD 254-711-C	2	Phengite	711-C-phg - 21	0.05375	0.00085	0.0265	0.0023	0.61805	0.0312934	0.7124	0.0089
238	3	2019-11-13	HDD 254-711-C	2	Phengite	711-C-phg - 8	0.0534	0.0011	0.02	0.0044	2.08893	0.105541	0.7523	0.011
239	3	2019-11-13	HDD 254-711-C	2	Phengite	711-C-phg - 16	0.0524	0.0016	0.029	0.01	2.13616	0.114739	0.744	0.01
240	1	2019-11-07	HDD 254-711-C	2	Phengite	711-C-phg - 17	0.0538	0.001	0.0499	0.0075	2.54178	0.0799482	0.7635	0.0048
241	3	2019-11-13	HDD 254-711-C	2	Phengite	711-C-phg - 17	0.0536	0.0024	0.0171	0.0059	4.51118	0.231388	0.796	0.014
242	1	2019-11-07	HDD 254-711-C	2	Phengite	711-C-phg - 13	0.0543	0.0011	0.016	0.012	4.55499	0.158223	0.8023	0.0059
243	1	2019-11-07	HDD 254-711-C	2	Phengite	711-C-phg - 18	0.05493	0.00097	0.018	0.011	4.97693	0.175287	0.8099	0.005
244	1	2019-11-07	HDD 254-711-C	2	Phengite	711-C-phg - 8	0.0541	0.001	0.0229	0.0084	4.99348	0.167632	0.8108	0.0058
245	1	2019-11-07	HDD 254-711-C	2	Phengite	711-C-phg - 21	0.0532	0.001	-0.005	0.013	5.3667	0.1739	0.8121	0.0055
246	1	2019-11-07	HDD 254-711-C	2	Phengite	711-C-phg - 6	0.0534	0.0011	-0.268	0.092	6.66655	0.220145	0.8379	0.0049
247	3	2019-11-13	HDD 254-711-C	2	Phengite	711-C-phg - 19	0.0509	0.002	0.0202	0.0047	7.9016	0.411502	0.848	0.015
248	3	2019-11-13	HDD 254-711-C	2	Phengite	711-C-phg - 13	0.0551	0.002	0.023	0.0039	12.0976	0.696711	0.921	0.015
249	1	2019-11-07	HDD 254-711-C	2	Phengite	711-C-phg - 12	0.0542	0.0016	-0.027	0.0097	13.2007	0.449743	0.9653	0.0092
250	1	2019-11-07	HDD 254-711-C	2	Phengite	711-C-phg - 11	0.0535	0.0016	-0.051	0.012	15.8574	0.510132	1.0002	0.0082
251	1	2019-11-07	HDD 254-711-C	2	Phengite	711-C-phg - 9	0.0507	0.0019	-0.0229	0.0072	17.5673	0.58558	1.033	0.01
252	1	2019-11-07	HDD 254-711-C	2	Phengite	711-C-phg - 7	0.0534	0.0018	-0.081	0.016	19.7275	0.639578	1.071	0.011
253	3	2019-11-13	HDD 254-711-C	2	Phengite	711-C-phg - 12	0.0525	0.0029	0.0051	0.0018	19.7631	1.00167	1.067	0.017
254	3	2019-11-13	HDD 254-711-C	2	Phengite	711-C-phg - 7	0.0529	0.0024	0.0074	0.0016	19.972	1.04653	1.034	0.014
255	1	2019-11-07	HDD 254-711-C	2	Phengite	711-C-phg - 22	0.0539	0.0018	-0.0183	0.0045	20.7479	0.675097	1.096	0.011
256	3	2019-11-13	HDD 254-711-C	2	Phengite	711-C-phg - 9	0.0506	0.0023	0.0061	0.0013	21.2707	1.06776	1.057	0.015
257	1	2019-11-07	HDD 254-711-C	2	Phengite	711-C-phg - 2	0.0521	0.0025	-0.0236	0.0074	21.3822	0.696406	1.13	0.013
258	3	2019-11-13	HDD 254-711-C	2	Phengite	711-C-phg - 2	0.0511	0.0037	0.0103	0.0024	21.6249	1.09935	1.064	0.019
259	3	2019-11-13	HDD 254-711-C	2	Phengite	711-C-phg - 3	0.0536	0.0025	0.0102	0.0022	22.4787	1.14699	1.094	0.016
260	1	2019-11-07	HDD 254-711-C	2	Phengite	711-C-phg - 20	0.0549	0.0019	-0.0146	0.0044	25.5557	0.856337	1.201	0.013
261	3	2019-11-13	HDD 254-711-C	2	Phengite	711-C-phg - 1	0.0528	0.0032	0.0152	0.0035	27.8827	1.39528	1.221	0.018
262	1	2019-11-07	HDD 254-711-C	2	Phengite	711-C-phg - 1	0.055	0.0021	-0.047	0.012	28.2216	1.25801	1.216	0.023
263	1	2019-11-07	NZD 021-159-F	2	Muscovite	159-F-msc - 2	0.05434	0.00065	0.0605	0.0058	1.92265	0.0591557	0.7479	0.0026
264	3	2019-11-13	NZD 021-159-F	2	Muscovite	159-F-msc - 20	0.05391	0.00088	0.0324	0.0062	2.13343	0.105187	0.7477	0.0074
265	3	2019-11-13	NZD 021-159-F	2	Muscovite	159-F-msc - 16	0.05359	0.0009	0.0351	0.0067	2.16885	0.107136	0.7414	0.0073
266	1	2019-11-07	NZD 021-159-F	2	Muscovite	159-F-msc - 20	0.0545	0.0011	0.054	0.01	2.20349	0.0688506	0.753	0.0047
267	1	2019-11-07	NZD 021-159-F	2	Muscovite	159-F-msc - 16	0.0547	0.00067	0.49	0.5	2.24035	0.0686979	0.7525	0.0026
268	3	2019-11-13	NZD 021-159-F	2	Muscovite	159-F-msc - 18	0.05425	0.0009	0.0367	0.0064	2.24969	0.111089	0.7469	0.0076
269	1	2019-11-07	NZD 021-159-F	2	Muscovite	159-F-msc - 18	0.05436	0.00061	0.0573	0.0054	2.25221	0.0691499	0.7518	0.0026
270	1	2019-11-07	NZD 021-159-F	2	Muscovite	159-F-msc - 17	0.05494	0.00064	0.0563	0.0057	2.25313	0.0697615	0.7521	0.0029
271	1	2019-11-07	NZD 021-159-F	2	Muscovite	159-F-msc - 10	0.05413	0.00078	0.058	0.0063	2.2706	0.0698317	0.7531	0.003
272	3	2019-11-13	NZD 021-159-F	2	Muscovite	159-F-msc - 17	0.05351	0.00094	0.029	0.006	2.28838	0.112771	0.748	0.0074
273	1	2019-11-07	NZD 021-159-F	2	Muscovite	159-F-msc - 14	0.05413	0.00086	0.0513	0.0058	2.30553	0.0735458	0.7502	0.0036
274	1	2019-11-07	NZD 021-159-F	2	Muscovite	159-F-msc - 9	0.05453	0.00069	0.0586	0.0063	2.3662	0.0729899	0.7533	0.0028
275	3	2019-11-13	NZD 021-159-F	2	Muscovite	159-F-msc - 15	0.05387	0.00095	0.0275	0.0059	2.37865	0.117317	0.7458	0.0075
276	3	2019-11-13	NZD 021-159-F	2	Muscovite	159-F-msc - 2	0.05386	0.00084	0.0286	0.0059	2.39863	0.118222	0.7486	0.0074
277	3	2019-11-13	NZD 021-159-F	2	Muscovite	159-F-msc - 3	0.05524	0.00092	0.0302	0.0076	2.41498	0.119023	0.7581	0.0077
278	3	2019-11-13	NZD 021-159-F	2	Muscovite	159-F-msc - 8	0.05368	0.00088	0.052	0.01	2.43769	0.120286	0.7513	0.0075
279	3	2019-11-13	NZD 021-159-F	2	Muscovite	159-F-msc - 14	0.05272	0.00088	0.0265	0.0059	2.46948	0.122018	0.7551	0.0076
280	1	2019-11-07	NZD 021-159-F	2	Muscovite	159-F-msc - 8	0.05487	0.00068	0.0578	0.005	2.47008	0.0762598	0.7551	0.0027
281	1	2019-11-07	NZD 021-159-F	2	Muscovite	159-F-msc - 15	0.05453	0.00068	0.04	0.014	2.4903	0.0765801	0.7581	0.0029
282	1	2019-11-07	NZD 021-159-F	2	Muscovite	159-F-msc - 1	0.05357	0.00069	0.0645	0.0062	2.56201	0.0785035	0.7568	0.0027
283	3	2019-11-13	NZD 021-159-F	2	Muscovite	159-F-msc - 9	0.05474	0.00095	0.02	0.0044	2.56575	0.126636	0.7583	0.0076
284	3	2019-11-13	NZD 021-159-F	2	Muscovite	159-F-msc - 19	0.05334	0.00089	0.0254	0.0055	2.58573	0.127533	0.7542	0.0076
285	3	2019-11-13	NZD 021-159-F	2	Muscovite	159-F-msc - 5	0.0551	0.001	0.0547	0.0096	2.593	0.12797	0.7581	0.0076
286	1	2019-11-07	NZD 021-159-F	2	Muscovite	159-F-msc - 5	0.05381	0.0007	0.0521	0.0055	2.59418	0.0794759	0.7548	0.0031
287	1	2019-11-07	NZD 021-159-F	2	Muscovite	159-F-msc - 7	0.05358	0.00071	0.0551	0.0055	2.62038	0.0801583	0.756	0.0029
288	3	2019-11-13	NZD 021-159-F	2	Muscovite	159-F-msc - 11	0.05426	0.00094	0.0436	0.0089	2.6266	0.129534	0.7547	0.0076
289	3	2019-11-13	NZD 021-159-F	2	Muscovite	159-F-msc - 13	0.0532	0.0012	0.0329	0.0067	2.6602	0.132245	0.7487	0.0079
290	1	2019-11-07	NZD 021-159-F	2	Muscovite	159-F-msc - 19	0.0549	0.001	0.0531	0.0079	2.66129	0.0828466	0.7603	0.004
291	1	2019-11-07	NZD 021-159-F	2	Muscovite	159-F-msc - 11	0.05356	0.0007	0.048	0.0085	2.66313	0.0822052	0.7597	0.0031
292	1	2019-11-07	NZD 021-159-F	2	Muscovite	159-F-msc - 13	0.0545	0.00078	0.0511	0.0068	2.72012	0.0836331	0.7583	0.0032
293	3	2019-11-13	NZD 021-159-F	2	Muscovite	159-F-msc - 7	0.0549	0.001	0.0292	0.0072	2.74921	0.135539	0.7606	0.0076
294	1	2019-11-07	NZD 021-159-F	2	Muscovite	159-F-msc - 4	0.05341	0.00074	0.0541	0.0062	2.85434	0.0876773	0.7629	0.0029
295	3	2019-11-13	NZD 021-159-F	2	Muscovite	159-F-msc - 10	0.054	0.001	0.0305	0.0056	2.87636	0.142511	0.7617	0.0077
296	3	2019-11-13	NZD 021-159-F	2	Muscovite	159-F-msc - 4	0.0548	0.001	0.051	0.011	2.91905	0.143932	0.7616	0.0077
297	1	2019-11-07	NZD 021-159-F	2	Muscovite	159-F-msc - 6	0.05444	0.00076	0.043	0.01	2.93063	0.0903857	0.7651	0.0031
298	1	2019-11-07	NZD 021-159-F	2	Muscovite	159-F-msc - 12	0.05404	0.00074	-0.29	0.18	2.99406	0.0918915	0.7663	0.0029
299	3	2019-11-13	NZD 021-159-F	2	Muscovite	159-F-msc - 6	0.05566	0.00099	0.0523	0.0095	3.15701	0.155906	0.7685	0.0079
300	1	2019-11-07	TPD 542-371-C	1	Biotite	371-C-bio1-trans - 16	0.0537	0.0011	0.00309	9.9e-05	18.2291	0.600445	1.1951	0.0097
301	3	2019-11-13	TPD 542-371-C	1	Biotite	371-C-bio1 - 10	0.0555	0.0019	0.00284	0.00051	24.6584	1.26504	1.226	0.015
302	3	2019-11-13	TPD 542-371-C	1	Biotite	371-C-bio1-trans - 2	0.0557	0.0024	0.00321	0.00043	33.0777	1.80341	1.349	0.021
303	3	2019-11-13	TPD 542-371-C	1	Biotite	371-C-bio1-trans - 4	0.0551	0.0024	0.00309	0.00046	34.6671	1.80598	1.514	0.02
304	3	2019-11-13	TPD 542-371-C	1	Biotite	371-C-bio1-trans - 3	0.0549	0.0021	0.00327	0.00029	38.3273	2.04959	1.697	0.035
305	3	2019-11-13	TPD 542-371-C	1	Biotite	371-C-bio1-trans - 1	0.0532	0.0026	0.0071	0.003	41.6151	2.17954	1.536	0.023
306	3	2019-11-13	TPD 542-371-C	1	Biotite	371-C-bio1-trans - 6	0.0548	0.003	0.0073	0.0019	52.8317	2.73585	1.947	0.035
307	3	2019-11-13	TPD 542-371-C	1	Biotite	371-C-bio1-trans - 5	0.0511	0.0023	0.00253	0.00072	56.0378	2.89969	2.023	0.029
308	1	2019-11-07	TPD 542-371-C	1	Biotite	371-C-bio1-trans - 2	0.0553	0.0019	0.00593	0.00055	64.4501	2.08822	2.261	0.029
309	3	2019-11-13	TPD 542-371-C	1	Biotite	371-C-bio1-trans - 9	0.0519	0.0028	0.0051	0.0013	69.2979	4.14403	2.422	0.058
310	3	2019-11-13	TPD 542-371-C	1	Biotite	371-C-bio1 - 4	0.0534	0.0022	0.0095	0.0017	70.0154	3.51468	2.584	0.034
311	1	2019-11-07	TPD 542-371-C	1	Biotite	371-C-bio1 - 16	0.053	0.0016	0.00621	0.00066	70.3794	2.25563	2.467	0.026
312	3	2019-11-13	TPD 542-371-C	1	Biotite	371-C-bio1 - 2	0.055	0.003	0.0045	0.0012	72.0226	3.86142	2.259	0.041
313	1	2019-11-07	TPD 542-371-C	1	Biotite	371-C-bio1 - 4	0.053	0.0017	0.00667	0.00066	73.5141	2.30854	2.707	0.021
314	1	2019-11-07	TPD 542-371-C	1	Biotite	371-C-bio1-trans - 8	0.0521	0.0019	0.00726	0.00082	74.1668	2.34438	2.413	0.02
315	3	2019-11-13	TPD 542-371-C	1	Biotite	371-C-bio1-trans - 11	0.0508	0.0029	0.0102	0.0024	84.0112	5.04884	2.73	0.082
316	1	2019-11-07	TPD 542-371-C	1	Biotite	371-C-bio1 - 6	0.0542	0.0019	0.00581	0.00067	84.7568	3.33506	2.501	0.05
317	3	2019-11-13	TPD 542-371-C	1	Biotite	371-C-bio1-trans - 7	0.0518	0.0031	0.0067	0.0018	86.6451	4.47051	2.865	0.047
318	3	2019-11-13	TPD 542-371-C	1	Biotite	371-C-bio1 - 11	0.056	0.0028	0.0074	0.0016	92.0672	4.61104	3.137	0.045
319	3	2019-11-13	TPD 542-371-C	1	Biotite	371-C-bio1 - 17	0.0495	0.0028	0.009	0.0019	94.1198	4.70835	3.07	0.038
320	1	2019-11-07	TPD 542-371-C	1	Biotite	371-C-bio1 - 5	0.0517	0.0019	0.0033	0.0025	94.8044	2.9889	3.192	0.025
321	3	2019-11-13	TPD 542-371-C	1	Biotite	371-C-bio1 - 1	0.0559	0.0038	0.0051	0.0016	95.9091	4.81784	3.333	0.047
322	3	2019-11-13	TPD 542-371-C	1	Biotite	371-C-bio1 - 5	0.0545	0.0026	0.0041	0.0011	96.4086	4.80461	3.513	0.044
323	1	2019-11-07	TPD 542-371-C	1	Biotite	371-C-bio1 - 17	0.0501	0.0018	-0.0078	0.0036	96.8544	3.06125	2.916	0.025
324	1	2019-11-07	TPD 542-371-C	1	Biotite	371-C-bio1-trans - 13	0.0535	0.002	0.0062	0.0029	100.274	3.17645	3.102	0.027
325	3	2019-11-13	TPD 542-371-C	1	Biotite	371-C-bio1 - 16	0.0542	0.0031	0.0119	0.0022	100.904	5.09722	3.185	0.043
326	1	2019-11-07	TPD 542-371-C	1	Biotite	371-C-bio1 - 9	0.0537	0.0021	-0.0115	0.004	101.487	3.24966	3.555	0.03
327	1	2019-11-07	TPD 542-371-C	1	Biotite	371-C-bio1 - 1	0.0543	0.0028	-0.0055	0.0043	102.683	3.28424	3.338	0.031
328	1	2019-11-07	TPD 542-371-C	1	Biotite	371-C-bio1-trans - 10	0.054	0.0024	0.0043	0.0027	103.05	3.32425	3.116	0.029
329	1	2019-11-07	TPD 542-371-C	1	Biotite	371-C-bio1 - 3	0.0554	0.0019	-0.0112	0.0035	104.346	3.29568	3.546	0.03
330	3	2019-11-13	TPD 542-371-C	1	Biotite	371-C-bio1 - 3	0.0488	0.003	0.007	0.0016	105.264	5.26842	3.667	0.048
331	3	2019-11-13	TPD 542-371-C	1	Biotite	371-C-bio1 - 13	0.0539	0.0029	0.0037	0.001	105.627	5.30386	3.685	0.048
332	1	2019-11-07	TPD 542-371-C	1	Biotite	371-C-bio1-trans - 12	0.0522	0.002	0.0029	0.0029	106.387	3.36043	3.263	0.032
333	1	2019-11-07	TPD 542-371-C	1	Biotite	371-C-bio1 - 8	0.053	0.0021	-0.0057	0.0028	108.428	3.4108	3.489	0.03
334	1	2019-11-07	TPD 542-371-C	1	Biotite	371-C-bio1 - 13	0.0535	0.0018	-0.0043	0.0027	109.485	3.45619	4.109	0.037
335	3	2019-11-13	TPD 542-371-C	1	Biotite	371-C-bio1 - 14	0.0508	0.0033	0.0046	0.0014	109.805	5.63819	3.532	0.057
336	1	2019-11-07	TPD 542-371-C	1	Biotite	371-C-bio1-trans - 1	0.0544	0.0022	0.0011	0.0029	110.221	3.74003	3.23	0.037
337	3	2019-11-13	TPD 542-371-C	1	Biotite	371-C-bio1-trans - 12	0.0552	0.0036	0.0064	0.0014	110.804	5.53597	3.272	0.045
338	3	2019-11-13	TPD 542-371-C	1	Biotite	371-C-bio1-trans - 10	0.0574	0.0039	0.0047	0.0013	111.894	5.94899	3.291	0.058
339	3	2019-11-13	TPD 542-371-C	1	Biotite	371-C-bio1-trans - 8	0.0487	0.0036	0.005	0.029	111.985	5.71559	3.628	0.049
340	3	2019-11-13	TPD 542-371-C	1	Biotite	371-C-bio1 - 9	0.0533	0.0027	0.0045	0.00096	113.075	5.64575	3.829	0.048
341	3	2019-11-13	TPD 542-371-C	1	Biotite	371-C-bio1-trans - 16	0.0527	0.0033	0.00125	0.00086	113.438	5.73857	3.418	0.048
342	1	2019-11-07	TPD 542-371-C	1	Biotite	371-C-bio1-trans - 14	0.0531	0.0021	-0.0086	0.0043	114.412	3.59862	3.391	0.029
343	1	2019-11-07	TPD 542-371-C	1	Biotite	371-C-bio1 - 11	0.0524	0.002	-0.0034	0.0025	116.104	3.67497	3.79	0.03
344	1	2019-11-07	TPD 542-371-C	1	Biotite	371-C-bio1-trans - 3	0.0543	0.0023	-0.0041	0.0028	116.233	3.65223	3.976	0.032
345	3	2019-11-13	TPD 542-371-C	1	Biotite	371-C-bio1-trans - 13	0.0526	0.0036	0.0041	0.0013	116.617	5.87009	3.481	0.052
346	1	2019-11-07	TPD 542-371-C	1	Biotite	371-C-bio1-trans - 15	0.0545	0.0021	-0.0125	0.0038	117.759	3.7234	3.616	0.034
347	3	2019-11-13	TPD 542-371-C	1	Biotite	371-C-bio1-trans - 14	0.0523	0.0034	0.0029	0.00098	120.159	6.05991	3.539	0.052
348	3	2019-11-13	TPD 542-371-C	1	Biotite	371-C-bio1 - 6	0.0512	0.0031	0.00408	0.00085	122.339	6.36448	3.632	0.057
349	3	2019-11-13	TPD 542-371-C	1	Biotite	371-C-bio1 - 19	0.0521	0.0032	-0.0481	0.0081	122.429	6.21132	3.523	0.061
350	3	2019-11-13	TPD 542-371-C	1	Biotite	371-C-bio1 - 8	0.0524	0.003	0.00287	0.00082	122.793	6.18609	4.005	0.053
351	3	2019-11-13	TPD 542-371-C	1	Biotite	371-C-bio1 - 12	0.0511	0.0035	0.00316	0.00096	123.519	6.26321	3.457	0.05
352	1	2019-11-07	TPD 542-371-C	1	Biotite	371-C-bio1 - 7	0.0536	0.0022	-0.0044	0.0027	124.285	3.91492	3.521	0.032
353	1	2019-11-07	TPD 542-371-C	1	Biotite	371-C-bio1-trans - 4	0.0502	0.0021	-0.0048	0.0029	124.837	3.9824	4.353	0.041
354	3	2019-11-13	TPD 542-371-C	1	Biotite	371-C-bio1 - 15	0.0555	0.0035	0.015	0.0028	124.972	6.37917	3.905	0.07
355	1	2019-11-07	TPD 542-371-C	1	Biotite	371-C-bio1 - 14	0.0546	0.0027	-0.0087	0.0035	125.205	4.0841	3.894	0.041
356	1	2019-11-07	TPD 542-371-C	1	Biotite	371-C-bio1-trans - 9	0.0509	0.0021	-0.0105	0.0033	126.675	4.06397	3.862	0.036
357	1	2019-11-07	TPD 542-371-C	1	Biotite	371-C-bio1-trans - 7	0.0538	0.0025	-0.0085	0.0033	127.135	4.04916	3.731	0.035
358	3	2019-11-13	TPD 542-371-C	1	Biotite	371-C-bio1 - 7	0.0534	0.0032	0.00429	0.00088	127.606	6.36477	3.926	0.052
359	1	2019-11-07	TPD 542-371-C	1	Biotite	371-C-bio1 - 2	0.0547	0.0023	-0.0065	0.0025	128.79	4.18606	3.746	0.036
360	3	2019-11-13	TPD 542-371-C	1	Biotite	371-C-bio1 - 18	0.0511	0.0032	0.0058	0.0012	129.786	6.50339	4.252	0.06
361	1	2019-11-07	TPD 542-371-C	1	Biotite	371-C-bio1-trans - 5	0.0519	0.0024	-0.0131	0.0042	130.996	4.18889	4.36	0.045
362	1	2019-11-07	TPD 542-371-C	1	Biotite	371-C-bio1 - 19	0.053	0.0023	0.0064	0.0014	131.731	4.41017	3.225	0.04
363	3	2019-11-13	TPD 542-371-C	1	Biotite	371-C-bio1-trans - 15	0.0519	0.0037	0.00263	0.00097	131.966	6.66627	3.916	0.055
364	1	2019-11-07	TPD 542-371-C	1	Biotite	371-C-bio1 - 18	0.0551	0.0022	-0.0059	0.0023	137.063	4.33874	4.981	0.043
365	1	2019-11-07	TPD 542-371-C	1	Biotite	371-C-bio1 - 10	0.0542	0.0024	-0.003	0.0024	141.476	4.75655	3.902	0.047
366	1	2019-11-07	TPD 542-371-C	1	Biotite	371-C-bio1 - 12	0.0512	0.0025	-0.0047	0.0028	144.234	4.629	4.085	0.043
367	1	2019-11-07	TPD 542-371-C	1	Biotite	371-C-bio1-trans - 6	0.0577	0.0028	-0.0079	0.0028	147.175	4.87697	4.493	0.051
368	1	2019-11-07	TPD 542-371-C	1	Biotite	371-C-bio1-trans - 11	0.0537	0.0025	-0.005	0.0028	147.819	4.6787	4.523	0.043
369	1	2019-11-07	TPD 542-371-C	1	Biotite	371-C-bio1 - 15	0.0524	0.0028	-0.0064	0.0025	163.079	5.2922	4.24	0.048
370	3	2019-11-13	TPD 542-371-C	2	Apatite	371-C-apa2 - 12	0.05404	0.0003	0.00445	7.3e-05	0.000129	1.8e-05	0.7071	0.0067
371	3	2019-11-13	TPD 542-371-C	2	Apatite	371-C-apa2 - 3	0.05441	0.00024	0.005352	6.3e-05	0.000219	1.7e-05	0.7087	0.0066
372	3	2019-11-13	TPD 542-371-C	2	Apatite	371-C-apa2 - 1	0.05439	0.00027	0.005954	8e-05	0.000994	6.8e-05	0.7098	0.0067
373	3	2019-11-13	TPD 542-371-C	2	Apatite	371-Capa2 - 2	0.05391	0.00025	0.006541	9.1e-05	8.6e-05	1.1e-05	0.7111	0.0067
374	3	2019-11-13	TPD 542-371-C	2	Biotite	371-C-bio2 - 5	0.0549	0.0023	0.00273	0.00026	19.1909	0.995202	1.0441	0.014
375	1	2019-11-07	TPD 542-371-C	2	Biotite	371-C-bio2 - 5	0.0542	0.0015	0.002096	6.5e-05	22.6141	1.30017	1.087	0.018
376	1	2019-11-07	TPD 542-371-C	2	Biotite	371-C-bio2 - 7	0.0526	0.0017	0.0053	0.00063	38.2417	2.25409	1.431	0.041
377	3	2019-11-13	TPD 542-371-C	2	Biotite	371-C-bio2 - 4	0.0571	0.0032	0.00239	0.00048	47.2461	2.46752	1.538	0.025
378	3	2019-11-13	TPD 542-371-C	2	Biotite	371-C-bio2 - 6	0.0553	0.0052	0.0039	0.0018	68.753	4.5772	1.91	0.055
379	1	2019-11-07	TPD 542-371-C	2	Biotite	371-C-bio2 - 3	0.0466	0.0061	-0.00163	0.00044	770.349	30.9604	13.75	0.41
380	3	2019-11-13	TPD 542-371-C	2	Phengite	371-C-phg - 10	0.05463	0.00086	0.0249	0.0024	0.434679	0.0229701	0.7209	0.0087
381	3	2019-11-13	TPD 542-371-C	2	Phengite	371-C-phg - 5	0.0544	0.0013	0.173	0.045	1.88367	0.0964931	0.7384	0.0092
382	1	2019-11-07	TPD 542-371-C	2	Phengite	371-C-phg - 9	0.0541	0.001	0.0227	0.0084	4.43916	0.16036	0.7909	0.0043
383	1	2019-11-07	TPD 542-371-C	2	Phengite	371-C-phg - 12	0.0537	0.00093	0.014	0.012	4.93648	0.230375	0.799	0.0046
384	3	2019-11-13	TPD 542-371-C	2	Phengite	371-C-phg - 6	0.0523	0.0019	0.0193	0.0047	9.59999	0.563837	0.8773	0.012
385	3	2019-11-13	TPD 542-371-C	2	Phengite	371-C-phg - 7	0.0548	0.0019	0.0149	0.0034	9.77255	0.61899	0.868	0.013

## Sheet: PlotDat1
Source sheet	Standards	0.2	2.39	1	2.3746	0.016	0.85	2.3586
Plot name	Average1	30.8	2.39	2	2.3831	0.0142	1.15	2.3586
Plot Type	15			3	2.3782	0.0166	1.15	2.3906
1st free col	8			4	2.4133	0.019	0.85	2.3906
Sigma Level	1			5	2.3773	0.0158	0.85	2.3586
Absolute Errs	TRUE			6	2.4066	0.0152	ErrBox	ErrBox
Symbol Type	4			7	2.3898	0.015	1.85	2.3689
Inverse Plot	FALSE			8	2.3867	0.0152	2.15	2.3689
Color Plot	TRUE			9	2.3968	0.0172	2.15	2.3973
3D plot	FALSE			10	2.3927	0.0182	1.85	2.3973
Linear	FALSE			11	2.3956	0.0152	1.85	2.3689
Data Range	G53:H82			12	2.3744	0.0142	ErrBox	ErrBox
Filled Symbols	TRUE			13	2.4139	0.0156	2.85	2.3616
ConcAge	FALSE			14	2.3925	0.017	3.15	2.3616
ConcSwap	FALSE			15	2.3876	0.016	3.15	2.3948
1st Symbol-row	1			16	2.4101	0.0154	2.85	2.3948
				17	2.3876	0.0164	2.85	2.3616
				18	2.3791	0.0164	ErrBox	ErrBox
				19	2.398	0.014	3.85	2.3943
				20	2.3937	0.0166	4.15	2.3943
				21	2.3843	0.0162	4.15	2.4323
				22	2.384	0.0164	3.85	2.4323
				23	2.4015	0.0162	3.85	2.3943
				24	2.3711	0.0148	ErrBox	ErrBox
				25	2.3806	0.0148	4.85	2.3615
				26	2.4264	0.0172	5.15	2.3615
				27	2.3827	0.0152	5.15	2.3931
				28	2.3917	0.0176	4.85	2.3931
				29	2.3792	0.0164	4.85	2.3615
				30	2.3846	0.0144	ErrBox	ErrBox
				IsoLine	IsoLine	IsoLine	5.85	2.3914
							6.15	2.3914
							6.15	2.4218
							5.85	2.4218
							5.85	2.3914
							ErrBox	ErrBox
							6.85	2.3748
							7.15	2.3748
							7.15	2.4048
							6.85	2.4048
							6.85	2.3748
							ErrBox	ErrBox
							7.85	2.3715
							8.15	2.3715
							8.15	2.4019
							7.85	2.4019
							7.85	2.3715
							ErrBox	ErrBox
							8.85	2.3796
							9.15	2.3796
							9.15	2.414
							8.85	2.414
							8.85	2.3796
							ErrBox	ErrBox
							9.85	2.3745
							10.15	2.3745
							10.15	2.4109
							9.85	2.4109
							9.85	2.3745
							ErrBox	ErrBox
							10.85	2.3804
							11.15	2.3804
							11.15	2.4108
							10.85	2.4108
							10.85	2.3804
							ErrBox	ErrBox
							11.85	2.3602
							12.15	2.3602
							12.15	2.3886
							11.85	2.3886
							11.85	2.3602
							ErrBox	ErrBox
							12.85	2.3983
							13.15	2.3983
							13.15	2.4295
							12.85	2.4295
							12.85	2.3983
							ErrBox	ErrBox
							13.85	2.3755
							14.15	2.3755
							14.15	2.4095
							13.85	2.4095
							13.85	2.3755
							ErrBox	ErrBox
							14.85	2.3716
							15.15	2.3716
							15.15	2.4036
							14.85	2.4036
							14.85	2.3716
							ErrBox	ErrBox
							15.85	2.3947
							16.15	2.3947
							16.15	2.4255
							15.85	2.4255
							15.85	2.3947
							ErrBox	ErrBox
							16.85	2.3712
							17.15	2.3712
							17.15	2.404
							16.85	2.404
							16.85	2.3712
							ErrBox	ErrBox
							17.85	2.3627
							18.15	2.3627
							18.15	2.3955
							17.85	2.3955
							17.85	2.3627
							ErrBox	ErrBox
							18.85	2.384
							19.15	2.384
							19.15	2.412
							18.85	2.412
							18.85	2.384
							ErrBox	ErrBox
							19.85	2.3771
							20.15	2.3771
							20.15	2.4103
							19.85	2.4103
							19.85	2.3771
							ErrBox	ErrBox
							20.85	2.3681
							21.15	2.3681
							21.15	2.4005
							20.85	2.4005
							20.85	2.3681
							ErrBox	ErrBox
							21.85	2.3676
							22.15	2.3676
							22.15	2.4004
							21.85	2.4004
							21.85	2.3676
							ErrBox	ErrBox
							22.85	2.3853
							23.15	2.3853
							23.15	2.4177
							22.85	2.4177
							22.85	2.3853
							ErrBox	ErrBox
							23.85	2.3563
							24.15	2.3563
							24.15	2.3859
							23.85	2.3859
							23.85	2.3563
							ErrBox	ErrBox
							24.85	2.3658
							25.15	2.3658
							25.15	2.3954
							24.85	2.3954
							24.85	2.3658
							ErrBox	ErrBox
							25.85	2.4092
							26.15	2.4092
							26.15	2.4436
							25.85	2.4436
							25.85	2.4092
							ErrBox	ErrBox
							26.85	2.3675
							27.15	2.3675
							27.15	2.3979
							26.85	2.3979
							26.85	2.3675
							ErrBox	ErrBox
							27.85	2.3741
							28.15	2.3741
							28.15	2.4093
							27.85	2.4093
							27.85	2.3741
							ErrBox	ErrBox
							28.85	2.3628
							29.15	2.3628
							29.15	2.3956
							28.85	2.3956
							28.85	2.3628
							ErrBox	ErrBox
							29.85	2.3702
							30.15	2.3702
							30.15	2.399
							29.85	2.399
							29.85	2.3702
							ErrBox	ErrBox

## Sheet: PlotDat2
Source sheet	Standards	0.2	2.38894	1	2.3746	0.016	26	2.4264	0.0172	0.85	2.3586
Plot name	Average2	30.8	2.38894	2	2.3831	0.0142	IsoLine	IsoLine	IsoLine	1.15	2.3586
Plot Type	15			3	2.3782	0.0166				1.15	2.3906
1st free col	11			4	2.4133	0.019				0.85	2.3906
Sigma Level	1			5	2.3773	0.0158				0.85	2.3586
Absolute Errs	TRUE			6	2.4066	0.0152				ErrBox	ErrBox
Symbol Type	4			7	2.3898	0.015				1.85	2.3689
Inverse Plot	FALSE			8	2.3867	0.0152				2.15	2.3689
Color Plot	TRUE			9	2.3968	0.0172				2.15	2.3973
3D plot	FALSE			10	2.3927	0.0182				1.85	2.3973
Linear	FALSE			11	2.3956	0.0152				1.85	2.3689
Data Range	G53:H82			12	2.3744	0.0142				ErrBox	ErrBox
Filled Symbols	TRUE			13	2.4139	0.0156				2.85	2.3616
ConcAge	FALSE			14	2.3925	0.017				3.15	2.3616
ConcSwap	FALSE			15	2.3876	0.016				3.15	2.3948
1st Symbol-row	1			16	2.4101	0.0154				2.85	2.3948
				17	2.3876	0.0164				2.85	2.3616
				18	2.3791	0.0164				ErrBox	ErrBox
				19	2.398	0.014				3.85	2.3943
				20	2.3937	0.0166				4.15	2.3943
				21	2.3843	0.0162				4.15	2.4323
				22	2.384	0.0164				3.85	2.4323
				23	2.4015	0.0162				3.85	2.3943
				24	2.3711	0.0148				ErrBox	ErrBox
				25	2.3806	0.0148				4.85	2.3615
				27	2.3827	0.0152				5.15	2.3615
				28	2.3917	0.0176				5.15	2.3931
				29	2.3792	0.0164				4.85	2.3931
				30	2.3846	0.0144				4.85	2.3615
				IsoLine	IsoLine	IsoLine	IsoLine			ErrBox	ErrBox
										5.85	2.3914
										6.15	2.3914
										6.15	2.4218
										5.85	2.4218
										5.85	2.3914
										ErrBox	ErrBox
										6.85	2.3748
										7.15	2.3748
										7.15	2.4048
										6.85	2.4048
										6.85	2.3748
										ErrBox	ErrBox
										7.85	2.3715
										8.15	2.3715
										8.15	2.4019
										7.85	2.4019
										7.85	2.3715
										ErrBox	ErrBox
										8.85	2.3796
										9.15	2.3796
										9.15	2.414
										8.85	2.414
										8.85	2.3796
										ErrBox	ErrBox
										9.85	2.3745
										10.15	2.3745
										10.15	2.4109
										9.85	2.4109
										9.85	2.3745
										ErrBox	ErrBox
										10.85	2.3804
										11.15	2.3804
										11.15	2.4108
										10.85	2.4108
										10.85	2.3804
										ErrBox	ErrBox
										11.85	2.3602
										12.15	2.3602
										12.15	2.3886
										11.85	2.3886
										11.85	2.3602
										ErrBox	ErrBox
										12.85	2.3983
										13.15	2.3983
										13.15	2.4295
										12.85	2.4295
										12.85	2.3983
										ErrBox	ErrBox
										13.85	2.3755
										14.15	2.3755
										14.15	2.4095
										13.85	2.4095
										13.85	2.3755
										ErrBox	ErrBox
										14.85	2.3716
										15.15	2.3716
										15.15	2.4036
										14.85	2.4036
										14.85	2.3716
										ErrBox	ErrBox
										15.85	2.3947
										16.15	2.3947
										16.15	2.4255
										15.85	2.4255
										15.85	2.3947
										ErrBox	ErrBox
										16.85	2.3712
										17.15	2.3712
										17.15	2.404
										16.85	2.404
										16.85	2.3712
										ErrBox	ErrBox
										17.85	2.3627
										18.15	2.3627
										18.15	2.3955
										17.85	2.3955
										17.85	2.3627
										ErrBox	ErrBox
										18.85	2.384
										19.15	2.384
										19.15	2.412
										18.85	2.412
										18.85	2.384
										ErrBox	ErrBox
										19.85	2.3771
										20.15	2.3771
										20.15	2.4103
										19.85	2.4103
										19.85	2.3771
										ErrBox	ErrBox
										20.85	2.3681
										21.15	2.3681
										21.15	2.4005
										20.85	2.4005
										20.85	2.3681
										ErrBox	ErrBox
										21.85	2.3676
										22.15	2.3676
										22.15	2.4004
										21.85	2.4004
										21.85	2.3676
										ErrBox	ErrBox
										22.85	2.3853
										23.15	2.3853
										23.15	2.4177
										22.85	2.4177
										22.85	2.3853
										ErrBox	ErrBox
										23.85	2.3563
										24.15	2.3563
										24.15	2.3859
										23.85	2.3859
										23.85	2.3563
										ErrBox	ErrBox
										24.85	2.3658
										25.15	2.3658
										25.15	2.3954
										24.85	2.3954
										24.85	2.3658
										ErrBox	ErrBox
										26.85	2.3675
										27.15	2.3675
										27.15	2.3979
										26.85	2.3979
										26.85	2.3675
										ErrBox	ErrBox
										27.85	2.3741
										28.15	2.3741
										28.15	2.4093
										27.85	2.4093
										27.85	2.3741
										ErrBox	ErrBox
										28.85	2.3628
										29.15	2.3628
										29.15	2.3956
										28.85	2.3956
										28.85	2.3628
										ErrBox	ErrBox
										29.85	2.3702
										30.15	2.3702
										30.15	2.399
										29.85	2.399
										29.85	2.3702
										ErrBox	ErrBox
										25.85	2.4092
										26.15	2.4092
										26.15	2.4436
										25.85	2.4436
										25.85	2.4092
										ErrBox	ErrBox

## Sheet: Standards
NIST610
Run	Spot	84Sr/86Sr	± 2σ	Sr/Ca	± 2σ	87Rb/86Sr	± 2σ	87Sr/86Sr	± 2σ
1	610 - 1	0.05421	0.00033	0.006273	6.9e-05	2.3936	0.006	0.7098	0.0017
1	610 - 2	0.05407	0.00033	0.00628	7.3e-05	2.3861	0.0058	0.7091	0.0016
1	610 - 3	0.05432	0.00032	0.006279	6.7e-05	2.3891	0.0055	0.7099	0.0015
1	610 - 4	0.05409	0.00031	0.006263	6.9e-05	2.3896	0.0058	0.7102	0.0015
1	610 - 5	0.05427	0.00034	0.006286	6.2e-05	2.3923	0.0053	0.7098	0.0015
1	610 - 6	0.05415	0.00033	0.006267	6.9e-05	2.3863	0.0052	0.7089	0.0017
1	610 - 7	0.05414	0.0003	0.006282	6.5e-05	2.3958	0.0054	0.7105	0.0016
1	610 - 8	0.05402	0.00031	0.006269	6.4e-05	2.3875	0.0052	0.7093	0.0015
1	610 - 9	0.05389	0.00034	0.006283	6.9e-05	2.3908	0.0052	0.7095	0.0015
1	610 - 10	0.05391	0.00029	0.00627	6.6e-05	2.3915	0.0057	0.7094	0.0015
1	610 - 11	0.05415	0.00031	0.006276	6.6e-05	2.387	0.0055	0.7099	0.0015
1	610 - 12	0.05444	0.00033	0.006284	6.6e-05	2.3905	0.0061	0.7107	0.0016
1	610 - 13	0.05424	0.0003	0.006264	6.7e-05	2.3905	0.0055	0.7091	0.0015
1	610 - 14	0.05415	0.00032	0.006284	6.9e-05	2.3881	0.0056	0.7096	0.0015
1	610 - 15	0.05408	0.0003	0.006274	6.1e-05	2.3935	0.0055	0.7104	0.0015
1	610 - 16	0.05379	0.0003	0.006272	6.5e-05	2.3872	0.0052	0.709	0.0016
1	610 - 17	0.05419	0.0003	0.006285	6.5e-05	2.3938	0.0061	0.7101	0.0015
1	610 - 18	0.05398	0.0003	0.006268	6.9e-05	2.3892	0.0057	0.7089	0.0015
1	610 - 19	0.05381	0.00031	0.006272	6.5e-05	2.3925	0.0059	0.7102	0.0016
1	610 - 20	0.05418	0.00029	0.006285	6.2e-05	2.3871	0.0057	0.71	0.0014
1	610 - 21	0.05386	0.00027	0.006269	6.7e-05	2.3852	0.0056	0.7091	0.0015
1	610 - 22	0.05408	0.00033	0.00627	6.5e-05	2.3906	0.0057	0.7099	0.0015
1	610 - 23	0.05411	0.00032	0.006287	7.2e-05	2.395	0.0059	0.71	0.0015
1	610 - 24	0.05403	0.0003	0.006271	6.3e-05	2.3884	0.0055	0.7093	0.0017
1	610 - 25	0.05406	0.00034	0.006277	6.4e-05	2.3941	0.0058	0.7097	0.0015
1	610 - 26	0.05428	0.0003	0.006278	6.5e-05	2.3888	0.0056	0.7099	0.0015
1	610 - 27	0.05403	0.00031	0.006265	6.6e-05	2.3878	0.0056	0.71	0.0015
1	610 - 28	0.05373	0.00031	0.006285	6.4e-05	2.3916	0.006	0.7091	0.0017
1	610 - 29	0.05397	0.00033	0.006277	6.7e-05	2.3891	0.0054	0.7098	0.0015
1	610 - 30	0.05433	0.00031	0.006272	6.3e-05	2.3902	0.0052	0.7097	0.0015
Run	Spot	84Sr/86Sr	± 2σ	Sr/Ca	± 2σ	87Rb/86Sr	± 2σ	87Sr/86Sr	± 2σ
2	610 - 1	0.05444	0.00044	0.00629	0.00015	2.404	0.0076	0.708	0.0018
2	610 - 2	0.05427	0.0004	0.00621	0.00013	2.3799	0.008	0.7108	0.0019
2	610 - 3	0.05394	0.00043	0.00643	0.00018	2.369	0.013	0.7112	0.0024
2	610 - 4	0.05457	0.00037	0.00618	0.00014	2.3856	0.0068	0.7106	0.0016
2	610 - 5	0.05411	0.00042	0.00635	0.00014	2.3866	0.0072	0.7083	0.0017
2	610 - 6	0.05404	0.00045	0.00634	0.00014	2.3939	0.0081	0.7107	0.0017
2	610 - 7	0.0545	0.0004	0.00624	0.00014	2.3957	0.0079	0.7093	0.0015
2	610 - 8	0.05404	0.00037	0.0062	0.00013	2.3938	0.0075	0.7085	0.0016
2	610 - 9	0.05436	0.0004	0.00633	0.00014	2.3824	0.0083	0.7117	0.0019
2	610 - 10	0.0543	0.00036	0.00618	0.00013	2.4	0.0071	0.7101	0.0017
2	610 - 11	0.05426	0.00036	0.00632	0.00014	2.3982	0.0084	0.7101	0.0017
2	610 - 12	0.05371	0.00042	0.00637	0.00015	2.3793	0.0083	0.7098	0.0019
2	610 - 13	0.05391	0.00041	0.00626	0.00014	2.3957	0.007	0.7081	0.0017
2	610 - 14	0.05385	0.00043	0.00627	0.00014	2.3797	0.0072	0.7092	0.0016
2	610 - 15	0.05394	0.00046	0.00629	0.00014	2.37	0.015	0.7124	0.0035
2	610 - 16	0.05456	0.00042	0.00621	0.00014	2.3984	0.0074	0.7094	0.0017
2	610 - 17	0.05415	0.00042	0.0063	0.00014	2.3903	0.0068	0.71	0.0018
2	610 - 18	0.05423	0.00042	0.00628	0.00014	2.38	0.015	0.7151	0.0078
Run	Spot	84Sr/86Sr	± 2σ	Sr/Ca	± 2σ	87Rb/86Sr	± 2σ	87Sr/86Sr	± 2σ
3	610 - 1	0.05415	0.00043	0.0062	0.00016	2.3746	0.008	0.7101	0.0015
3	610 - 2	0.05326	0.00043	0.00642	0.00015	2.3831	0.0071	0.7082	0.0016
3	610 - 3	0.05379	0.00042	0.00641	0.00018	2.3782	0.0083	0.7122	0.0016
3	610 - 4	0.05456	0.00045	0.00613	0.00015	2.4133	0.0095	0.7084	0.0014
3	610 - 5	0.05331	0.00047	0.00627	0.00017	2.3773	0.0079	0.7095	0.0015
3	610 - 6	0.05454	0.00048	0.00612	0.00016	2.4066	0.0076	0.7095	0.0015
3	610 - 7	0.05414	0.00044	0.00652	0.00016	2.3898	0.0075	0.713	0.0015
3	610 - 8	0.05433	0.00045	0.00629	0.00017	2.3867	0.0076	0.7071	0.0014
3	610 - 9	0.05349	0.00046	0.00638	0.00018	2.3968	0.0086	0.7088	0.0014
3	610 - 10	0.05358	0.00041	0.0064	0.00017	2.3927	0.0091	0.7111	0.0015
3	610 - 11	0.05477	0.00044	0.00623	0.00017	2.3956	0.0076	0.7107	0.0015
3	610 - 12	0.05391	0.00044	0.00634	0.00017	2.3744	0.0071	0.7084	0.0015
3	610 - 13	0.0546	0.00043	0.00612	0.00015	2.4139	0.0078	0.71	0.0015
3	610 - 14	0.05418	0.00045	0.00644	0.00018	2.3925	0.0085	0.7097	0.0016
3	610 - 15	0.05424	0.00048	0.00616	0.00016	2.3876	0.008	0.7095	0.0015
3	610 - 16	0.05452	0.00047	0.00618	0.00017	2.4101	0.0077	0.7102	0.0016
3	610 - 17	0.05401	0.00042	0.00613	0.00016	2.3876	0.0082	0.7094	0.0015
3	610 - 18	0.05423	0.00044	0.00634	0.00017	2.3791	0.0082	0.7108	0.0015
3	610 - 19	0.05414	0.00046	0.00615	0.00015	2.398	0.007	0.707	0.0015
3	610 - 20	0.05429	0.00043	0.00618	0.00017	2.3937	0.0083	0.7121	0.0015
3	610 - 21	0.05385	0.00045	0.00625	0.00017	2.3843	0.0081	0.708	0.0016
3	610 - 22	0.05407	0.00042	0.00629	0.00016	2.384	0.0082	0.7112	0.0014
3	610 - 23	0.05453	0.00045	0.0061	0.00017	2.4015	0.0081	0.708	0.0015
3	610 - 24	0.05385	0.0005	0.00647	0.00018	2.3711	0.0074	0.71	0.0015
3	610 - 25	0.05375	0.00051	0.00627	0.00017	2.3806	0.0074	0.7102	0.0015
3	610 - 26	0.05471	0.00043	0.00619	0.00016	2.4264	0.0086	0.7108	0.0015
3	610 - 27	0.0537	0.00045	0.00638	0.00016	2.3827	0.0076	0.709	0.0015
3	610 - 28	0.05421	0.00045	0.0063	0.00016	2.3917	0.0088	0.7079	0.0015
3	610 - 29	0.0539	0.00045	0.00648	0.0002	2.3792	0.0082	0.7102	0.0015
3	610 - 30	0.05443	0.00052	0.00634	0.00019	2.3846	0.0072	0.7107	0.0016
Mica-Mg
Run	Spot	84Sr/86Sr	± 2σ	Sr/Ca	± 2σ	87Rb/86Sr	± 2σ	87Sr/86Sr	± 2σ
1	micaMg - 1	0.0532	0.0017	0.0038	0.0034	172.3	1.3	1.866	0.014
1	micaMg - 2	0.0536	0.0017	0.0045	0.0033	172.5	1.3	1.886	0.014
1	micaMg - 3	0.0524	0.0015	0.0043	0.0033	171.8	1.3	1.865	0.014
1	micaMg - 4	0.0516	0.0017	0.0023	0.0037	172	1.2	1.858	0.016
1	micaMg - 5	0.0542	0.0016	-0.0013	0.0035	172.7	1.3	1.865	0.014
1	micaMg - 6	0.055	0.0018	-0.0024	0.0036	169.6	1.7	1.842	0.015
1	micaMg - 7	0.0527	0.0015	0.004	0.0038	176.6	1.5	1.868	0.013
1	micaMg - 8	0.0533	0.0017	-0.0053	0.0037	171.8	1.4	1.887	0.014
1	micaMg - 9	0.0528	0.0016	-0.0061	0.004	172.6	1.3	1.87	0.014
1	micaMg - 10	0.0539	0.0017	-0.0091	0.0045	170.4	1.2	1.871	0.014
1	micaMg - 11	0.0519	0.0017	-0.0078	0.0043	169.3	1.6	1.825	0.015
1	micaMg - 12	0.0525	0.0015	-0.0107	0.0049	172.3	1.3	1.889	0.014
1	micaMg - 13	0.0526	0.0017	-0.0099	0.0053	171.8	1.2	1.842	0.014
1	micaMg - 14	0.0525	0.0016	-0.0209	0.0063	170.5	1.3	1.885	0.014
1	micaMg - 15	0.0536	0.0017	-0.0214	0.0067	165.5	1.1	1.841	0.014
1	micaMg - 16	0.0542	0.0016	-0.0328	0.0073	163.5	1.2	1.833	0.014
1	micaMg - 17	0.055	0.0017	-0.0255	0.0066	167.8	1.4	1.832	0.014
1	micaMg - 18	0.0536	0.0017	-0.0217	0.006	170.1	1.4	1.885	0.016
1	micaMg - 19	0.0538	0.0016	-0.0439	0.0097	170.8	1.3	1.882	0.013
1	micaMg - 20	0.0532	0.0016	0.78	0.33	168.8	1.3	1.868	0.014
1	micaMg - 21	0.0525	0.0017	0.178	0.038	166.6	1.4	1.857	0.014
1	micaMg - 22	0.0543	0.0017	-0.064	0.012	170.6	1.4	1.871	0.013
1	micaMg - 23	0.0532	0.0016	0.095	0.018	171.5	1.3	1.862	0.014
1	micaMg - 24	0.055	0.0017	-0.104	0.019	168.8	1.4	1.87	0.016
1	micaMg - 25	0.051	0.0018	0.112	0.019	173.9	1.2	1.864	0.014
1	micaMg - 26	0.0532	0.0016	0.0343	0.0078	171.4	1.1	1.887	0.013
1	micaMg - 27	0.0555	0.0018	0.068	0.01	169	1.4	1.876	0.015
1	micaMg - 28	0.0521	0.0017	-0.106	0.017	172.4	1.3	1.868	0.015
1	micaMg - 29	0.0528	0.0017	0.054	0.01	170.6	1.1	1.873	0.014
1	micaMg - 30	0.0529	0.0017	0.084	0.015	170.8	1.4	1.871	0.013
Run	Spot	84Sr/86Sr	± 2σ	Sr/Ca	± 2σ	87Rb/86Sr	± 2σ	87Sr/86Sr	± 2σ
2	micaMg - 1	0.052	0.0021	0.0014	0.0011	170.7	1.5	1.872	0.017
2	micaMg - 2	0.0506	0.0022	0.0007	0.0011	170.1	1.5	1.862	0.018
2	micaMg - 3	0.0536	0.002	0.0017	0.001	170	1.5	1.84	0.016
2	micaMg - 4	0.0521	0.0018	0.0009	0.0011	167.9	1.4	1.821	0.017
2	micaMg - 5	0.0524	0.0022	0.0001	0.0011	158.9	1.3	1.789	0.016
2	micaMg - 6	0.0543	0.002	0.0008	0.0011	162.7	1.6	1.837	0.016
2	micaMg - 7	0.0529	0.0021	0.0013	0.001	157.8	1.3	1.813	0.016
2	micaMg - 8	0.0534	0.0022	0.0001	0.0011	162.6	1.4	1.865	0.018
2	micaMg - 9	0.0522	0.0019	0.0004	0.0011	155.4	1.4	1.809	0.018
2	micaMg - 10	0.0548	0.002	0.0011	0.0012	166.3	1.3	1.85	0.016
2	micaMg - 11	0.053	0.002	0.0004	0.0011	163.6	1.6	1.825	0.017
2	micaMg - 12	0.0526	0.0022	0.0006	0.0011	167	1.3	1.866	0.017
2	micaMg - 13	0.0521	0.002	0.0003	0.0011	166.4	1.4	1.831	0.017
2	micaMg - 14	0.0534	0.0022	0.0002	0.0011	165.3	1.5	1.845	0.017
2	micaMg - 15	0.0532	0.002	0.00028	0.00099	166.8	1.4	1.847	0.017
2	micaMg - 16	0.0551	0.0021	-0.0009	0.0011	169.4	1.4	1.849	0.017
2	micaMg - 17	0.0529	0.002	-0.0009	0.0011	169.2	1.4	1.836	0.018
Run	Spot	84Sr/86Sr	± 2σ	Sr/Ca	± 2σ	87Rb/86Sr	± 2σ	87Sr/86Sr	± 2σ
3	micaMg - 1	0.0543	0.0022	0.0007	0.0011	165.2	1.4	1.846	0.014
3	micaMg - 2	0.0544	0.0026	-0.0026	0.0012	165.6	1.4	1.843	0.015
3	micaMg - 3	0.0545	0.0024	-0.0018	0.0012	159.5	1.2	1.832	0.015
3	micaMg - 4	0.0531	0.0024	0.0009	0.0011	169.4	1.3	1.851	0.015
3	micaMg - 5	0.0533	0.0022	0.0029	0.0011	170.7	1.3	1.876	0.016
3	micaMg - 6	0.0551	0.0024	0.0028	0.0013	172.9	1.3	1.862	0.016
3	micaMg - 7	0.0512	0.002	0.0062	0.0015	175.8	1.7	1.863	0.017
3	micaMg - 8	0.0533	0.0024	0.0078	0.0017	169.1	1.4	1.856	0.015
3	micaMg - 9	0.0543	0.0025	0.0093	0.0017	169.6	1.3	1.87	0.015
3	micaMg - 10	0.0514	0.0026	0.0067	0.0016	170.5	1.2	1.873	0.015
3	micaMg - 11	0.0554	0.0024	0.0064	0.0013	174.2	1.2	1.829	0.015
3	micaMg - 12	0.0553	0.0024	0.069	0.075	173.2	1.5	1.836	0.016
3	micaMg - 13	0.0533	0.0022	0.0286	0.0061	172.5	1.3	1.833	0.015
3	micaMg - 14	0.0531	0.0023	0.0187	0.0033	171.6	1.3	1.833	0.016
3	micaMg - 15	0.0534	0.0023	0.0083	0.0017	175.2	1.4	1.869	0.015
3	micaMg - 16	0.0553	0.0024	0.0126	0.0023	169.4	1.4	1.824	0.015
3	micaMg - 17	0.0535	0.0023	0.0219	0.0047	165	1.5	1.815	0.016
3	micaMg - 18	0.053	0.0023	0.0082	0.0018	166.9	1.4	1.836	0.015
3	micaMg - 19	0.0515	0.0022	0.0068	0.0014	167.2	1.2	1.858	0.015
3	micaMg - 20	0.0519	0.0022	0.0064	0.0015	163	1.2	1.826	0.014
3	micaMg - 21	0.0513	0.0023	0.0059	0.0014	162.9	1.4	1.815	0.015
3	micaMg - 22	0.0519	0.0025	0.0049	0.0013	169	1.4	1.834	0.016
3	micaMg - 23	0.0536	0.0023	0.004	0.0012	162.6	1.4	1.802	0.017
3	micaMg - 24	0.0526	0.0024	0.0019	0.001	164.1	1.6	1.846	0.018
3	micaMg - 25	0.0537	0.0025	0.003	0.0011	170.3	1.6	1.851	0.015
3	micaMg - 26	0.0531	0.0024	-0.00022	0.00097	166.8	1.8	1.798	0.016
3	micaMg - 27	0.0533	0.0022	0.0017	0.0011	169.1	1.3	1.824	0.016
3	micaMg - 28	0.0531	0.0022	0.0081	0.0021	172.7	1.6	1.823	0.017
3	micaMg - 29	0.0531	0.0024	0.0044	0.0012	173.6	1.5	1.845	0.017
3	micaMg - 30	0.0534	0.0025	0.047	0.06	173.2	1.5	1.853	0.018
CK001B
Run	Spot	84Sr/86Sr	± 2σ	Sr/Ca	± 2σ	87Rb/86Sr	± 2σ	87Sr/86Sr	± 2σ
1	CK001B-bio - 32	0.0521	0.0027	0.00119	0.00011	30.1521	1.93807	0.902	0.017
1	CK001B-bio - 33	0.0537	0.0026	0.00186	0.00025	79.9765	2.79506	1.194	0.023
1	CK001B-bio - 12	0.0475	0.0039	0.00274	0.00043	171.812	3.36253	1.705	0.034
1	CK001B-bio - 14	0.0484	0.003	0.0066	0.0015	206.652	8.26548	1.851	0.046
1	CK001B-bio - 29	0.0507	0.0026	0.0165	0.0029	233.495	10.1988	2.086	0.067
1	CK001B-bio - 25	0.0539	0.0035	0.0384	0.0062	308.415	5.96324	2.476	0.044
1	CK001B-bio - 23	0.0553	0.0042	0.319	0.097	322.664	5.12029	2.568	0.042
1	CK001B-bio - 8	0.0547	0.0065	0.000735	8.4e-05	455.039	13.1274	3.182	0.086
1	CK001B-bio - 31	0.0465	0.0046	0.0163	0.0049	464.232	38.6995	3.32	0.22
1	CK001B-bio - 13	0.0539	0.0077	0.004	0.0017	512.953	15.8975	3.65	0.12
1	CK001B-bio - 6	0.0543	0.0055	0.00317	0.00077	571.786	22.3008	3.88	0.14
1	CK001B-bio - 19	0.0521	0.006	0.00272	0.00062	726.224	17.9478	4.85	0.12
1	CK001B-bio - 18	0.0483	0.0052	0.0056	0.0011	747.367	41.5849	5.11	0.25
1	CK001B-bio - 20	0.0534	0.0069	0.00104	0.00067	785.057	23.4114	5.37	0.16
1	CK001B-bio - 40	0.0542	0.0074	-0.001	0.029	807.12	28.8647	5.24	0.2
1	CK001B-bio - 10	0.052	0.01	0.004	0.0013	836.536	40.7267	5.63	0.3
1	CK001B-bio - 38	0.0548	0.0077	0.0133	0.0034	838.375	54.4461	5.62	0.34
1	CK001B-bio - 44	0.048	0.0062	-0.005	0.0011	848.487	23.4828	5.47	0.15
1	CK001B-bio - 24	0.057	0.012	0.0097	0.0024	901.805	42.5963	6.13	0.27
1	CK001B-bio - 21	0.047	0.0064	0.0049	0.0012	918.351	28.0683	6.21	0.19
1	CK001B-bio - 1	0.0507	0.0068	0.00344	0.00086	930.302	24.4796	6.24	0.16
1	CK001B-bio - 22	0.0556	0.0077	0.0038	0.0012	953.284	28.1059	6.47	0.2
1	CK001B-bio - 34	0.0462	0.0061	-0.015	0.044	993.732	28.1512	6.51	0.19
1	CK001B-bio - 41	0.0518	0.007	0.0037	0.00086	1022.23	28.1842	6.67	0.19
1	CK001B-bio - 2	0.0479	0.0057	0.00367	0.00088	1029.58	36.3265	6.75	0.24
1	CK001B-bio - 36	0.0482	0.0059	0.00394	0.00078	1030.5	29.0937	6.62	0.18
1	CK001B-bio - 5	0.0514	0.0076	0.0048	0.001	1127.03	45.4979	7.2	0.3
1	CK001B-bio - 49	0.0539	0.0069	0.00278	0.0006	1159.2	39.1681	7.53	0.26
1	CK001B-bio - 17	0.0409	0.0057	0.00389	0.00072	1167.47	32.8523	7.66	0.21
1	CK001B-bio - 45	0.0518	0.0082	-0.0247	0.0064	1206.08	47.3819	7.9	0.31
1	CK001B-bio - 47	0.0466	0.0074	0.004	0.014	1225.39	49.2172	8.05	0.33
1	CK001B-bio - 7	0.0437	0.0064	0.0057	0.001	1229.06	42.8602	7.85	0.29
1	CK001B-bio - 28	0.0488	0.0074	0.015	0.0034	1232.74	38.3365	7.53	0.25
1	CK001B-bio - 15	0.0442	0.0063	0.00334	0.00075	1241.02	34.7375	8.02	0.22
1	CK001B-bio - 11	0.0473	0.0097	0.0035	0.0012	1301.69	62.0344	8.44	0.4
1	CK001B-bio - 50	0.0421	0.0069	0.0044	0.00085	1302.61	42.0252	8.37	0.28
1	CK001B-bio - 46	0.0513	0.0071	0.0047	0.00096	1432.22	47.585	9.13	0.31
1	CK001B-bio - 37	0.0496	0.0091	-0.0272	0.0063	1456.12	56.6836	9.26	0.38
Run	Spot	84Sr/86Sr	± 2σ	Sr/Ca	± 2σ	87Rb/86Sr	± 2σ	87Sr/86Sr	± 2σ
2	CK001B-bio - 24	0.0549	0.0026	-0.0001	0.0017	56.1043	2.68791	1.068	0.021
2	CK001B-bio - 10	0.0575	0.0027	0.0013	0.0015	66.0106	1.62098	1.108	0.021
2	CK001B-bio - 2	0.0532	0.0038	0.00136	0.00073	91.4704	3.09504	1.24	0.028
2	CK001B-bio - 31	0.0516	0.0035	-0.00045	0.00083	96.0069	3.98586	1.289	0.03
2	CK001B-bio - 25	0.058	0.0077	0.00028	2.9e-05	105.45	3.08189	1.339	0.046
2	CK001B-bio - 21	0.0545	0.0033	0.00045	0.0006	111.19	3.03181	1.34	0.023
2	CK001B-bio - 19	0.0512	0.0034	0.00113	0.00043	119.615	2.61334	1.374	0.024
2	CK001B-bio - 16	0.0507	0.0041	0.0014	0.0005	119.893	2.46697	1.407	0.027
2	CK001B-bio - 9	0.0546	0.0041	0.00033	0.00051	134.058	2.44485	1.494	0.026
2	CK001B-bio - 11	0.0517	0.0043	0.00179	0.00046	149.889	5.00325	1.612	0.038
2	CK001B-bio - 33	0.0526	0.0044	0.00025	0.00045	173.035	5.5436	1.711	0.039
2	CK001B-bio - 40	0.0526	0.0055	0.00088	0.0002	179.145	4.74399	1.72	0.044
2	CK001B-bio - 8	0.0517	0.0046	0.00022	0.0009	198.124	21.4411	1.9	0.13
2	CK001B-bio - 30	0.046	0.0064	0.00022	0.00024	258.487	6.85074	2.199	0.059
2	CK001B-bio - 29	0.0469	0.0042	0.00106	0.00018	290.243	6.81633	2.367	0.051
2	CK001B-bio - 28	0.0509	0.0056	0.00066	0.00024	294.039	9.12676	2.393	0.075
2	CK001B-bio - 13	0.0396	0.0043	0.00048	0.00032	316.628	10.9451	2.628	0.075
2	CK001B-bio - 38	0.0451	0.0056	0.000473	6.7e-05	362.919	10.3365	2.782	0.081
2	CK001B-bio - 39	0.0516	0.009	0.000406	8.1e-05	442.539	18.4619	3.33	0.14
2	CK001B-bio - 6	0.0474	0.0062	4e-05	0.00023	537.898	21.4772	3.7	0.14
2	CK001B-bio - 12	0.047	0.0055	-0.00032	0.00017	597.15	20.8615	4.13	0.14
2	CK001B-bio - 15	0.0443	0.007	-0.00013	0.00019	668.438	24.6452	4.58	0.17
2	CK001B-bio - 37	0.0519	0.0066	0.00018	0.0001	730.467	26.6542	4.88	0.16
2	CK001B-bio - 4	0.0468	0.0087	8e-05	0.00019	739.726	25.8303	5.2	0.18
2	CK001B-bio - 17	0.0398	0.0065	-0.00014	0.00015	773.055	25.9864	5.33	0.19
2	CK001B-bio - 36	0.0477	0.0073	3e-05	0.00013	783.239	32.1221	5.33	0.21
2	CK001B-bio - 3	0.0585	0.0099	-9e-05	0.00018	806.384	27.8623	5.27	0.19
2	CK001B-bio - 26	0.0423	0.0071	-0.00011	0.00013	833.233	26.2831	5.52	0.16
2	CK001B-bio - 1	0.0444	0.0078	-0.00034	0.00014	838.788	28.0154	5.6	0.18
2	CK001B-bio - 14	0.0466	0.0093	-0.00015	0.00014	873.969	38.6516	5.84	0.24
2	CK001B-bio - 5	0.048	0.011	-0.00012	0.00014	1050.8	47.277	6.69	0.28
2	CK001B-bio - 23	0.0561	0.0088	-0.00018	9.3e-05	1060.98	42.8952	7.07	0.28
2	CK001B-bio - 22	0.0453	0.0076	-0.000137	8.6e-05	1090.61	41.2649	7.08	0.26
2	CK001B-bio - 7	0.056	0.011	-0.00018	0.00011	1241.52	51.5263	7.92	0.34
2	CK001B-bio - 32	0.0536	0.0089	-0.000152	7.5e-05	1285.96	49.9469	8.43	0.32
2	CK001B-bio - 20	0.0492	0.0086	-0.000137	6.8e-05	1290.59	45.6168	8.36	0.29
2	CK001B-bio - 27	0.056	0.011	-0.000133	8.2e-05	1310.03	53.555	8.43	0.32
2	CK001B-bio - 18	0.0426	0.008	-0.00011	7.1e-05	1341.5	51.0528	8.73	0.33
Run	Spot	84Sr/86Sr	± 2σ	Sr/Ca	± 2σ	87Rb/86Sr	± 2σ	87Sr/86Sr	± 2σ
3	CK001B-bio - 42	0.0517	0.0031	0.0086	0.0023	71.7501	6.1143	1.179	0.036
3	CK001B-bio - 43	0.0523	0.0036	0.0067	0.002	97.8163	5.39621	1.331	0.027
3	CK001B-bio - 12	0.0458	0.0043	0.00125	0.0002	133.601	8.19495	1.493	0.038
3	CK001B-bio - 31	0.0549	0.0071	0.00105	0.00042	231.599	15.144	2.009	0.079
3	CK001B-bio - 13	0.0425	0.0066	0.0005	0.00023	272.923	15.0839	2.335	0.066
3	CK001B-bio - 16	0.0569	0.0073	0.00079	0.00045	336.045	29.5642	2.72	0.15
3	CK001B-bio - 40	0.0478	0.0072	0.0009	0.0002	376.915	21.4908	2.899	0.085
3	CK001B-bio - 38	0.0487	0.0086	0.00059	0.00042	386.906	23.9305	3.14	0.12
3	CK001B-bio - 8	0.0604	0.0088	0.00032	0.00011	395.988	22.7613	3.051	0.096
3	CK001B-bio - 33	0.0508	0.0074	9e-05	0.00016	545.846	31.4129	4.01	0.13
3	CK001B-bio - 39	0.0522	0.0086	0.00046	0.0002	602.156	35.7052	4.31	0.17
3	CK001B-bio - 26	0.0512	0.0073	0.00056	0.00023	624.862	51.1203	4.4	0.19
3	CK001B-bio - 10	0.047	0.013	0.00077	0.00048	686.622	71.1741	5	0.46
3	CK001B-bio - 47	0.0438	0.0091	0.0051	0.0015	698.429	43.8222	4.9	0.3
3	CK001B-bio - 20	0.0478	0.0085	0	0.00015	740.207	41.9463	5.25	0.19
3	CK001B-bio - 4	0.0436	0.0087	0.00031	0.00019	789.252	52.5254	5.45	0.33
3	CK001B-bio - 2	0.0445	0.008	0.00019	0.00014	790.16	46.9198	5.56	0.24
3	CK001B-bio - 21	0.0464	0.0079	-0.00013	0.00012	826.489	48.4076	5.73	0.25
3	CK001B-bio - 7	0.0466	0.0071	-4.6e-05	9.5e-05	909.138	54.8312	6.09	0.34
3	CK001B-bio - 1	0.0469	0.0081	3e-05	0.00011	916.404	52.6346	6.28	0.36
3	CK001B-bio - 11	0.051	0.014	0.00012	0.00014	921.853	69.4774	6.25	0.52
3	CK001B-bio - 22	0.0457	0.0088	-0.00012	0.00013	923.67	60.4754	6.3	0.43
3	CK001B-bio - 18	0.0442	0.0078	5e-06	7.8e-05	928.211	53.1319	6.22	0.55
3	CK001B-bio - 3	0.049	0.01	0.0001	0.00011	1043.56	66.7233	6.91	0.51
3	CK001B-bio - 44	0.0384	0.0091	0.0025	0.0077	1057.18	65.5432	7.13	0.83
3	CK001B-bio - 30	0.0484	0.0086	7.6e-05	8.8e-05	1060.81	62.5192	7.27	0.5
3	CK001B-bio - 17	0.064	0.012	2.4e-05	7.7e-05	1067.17	65.3866	7.04	0.42
3	CK001B-bio - 49	0.0313	0.0081	0.00033	0.00012	1071.71	67.7925	7.04	0.7
3	CK001B-bio - 34	0.0365	0.0075	0.000125	8.4e-05	1078.98	62.7746	7.33	0.61
3	CK001B-bio - 23	0.0515	0.0083	-6.7e-05	8.3e-05	1081.7	63.3777	7.19	0.61
3	CK001B-bio - 50	0.038	0.0084	0.00089	0.00019	1088.97	64.68	7.33	1.3
3	CK001B-bio - 29	0.0495	0.0098	0.000125	9.8e-05	1107.13	67.5055	7.49	0.92
3	CK001B-bio - 14	0.045	0.0084	0.000146	8.8e-05	1119.85	62.2341	7.46	0.56
3	CK001B-bio - 24	0.043	0.0094	-1.3e-05	5.4e-05	1121.66	68.0824	7.46	1.1
3	CK001B-bio - 15	0.0549	0.0096	6.9e-05	7.9e-05	1141.64	69.4106	7.59	0.46
3	CK001B-bio - 41	0.0383	0.0082	0.00032	9e-05	1199.77	73.3256	7.93	0.63
3	CK001B-bio - 5	0.051	0.011	3.3e-05	8.4e-05	1235.19	84.673	8.1	0.91
3	CK001B-bio - 28	0.0432	0.0097	4.2e-05	8.5e-05	1251.54	78.1003	8.17	0.93
3	CK001B-bio - 48	0.048	0.011	0.00079	0.00019	1278.79	83.1783	8.53	0.85
3	CK001B-bio - 35	0.047	0.01	8.9e-05	7.9e-05	1308.76	91.7198	8.66	0.57
3	CK001B-bio - 6	0.0505	0.0099	1e-07	6.7e-05	1312.39	79.9363	8.55	0.79
3	CK001B-bio - 19	0.0543	0.0098	4.1e-05	6.6e-05	1326.92	81.0497	8.79	0.84
3	CK001B-bio - 45	0.048	0.011	0.00045	0.00012	1355.99	83.2798	8.85	0.66
3	CK001B-bio - 32	0.0379	0.0089	0.000104	8.1e-05	1378.69	90.4621	9.17	0.49
3	CK001B-bio - 37	0.04	0.011	7.5e-05	7.5e-05	1526.75	67.3383	10.17	0.44
3	CK001B-bio - 37	0.04	0.011	7.5e-05	7.5e-05	1530.37	100.257	10.17	1
