# Supplementary figures and images for: Resolving multiple geological events using in situ Rb-Srgeochronology: implications for metallogenesis at Tropicana, WesternAustralia
Source: Copernicus journal article supplement (doi:10.5194/gchron-2020-7), 2020-03-31

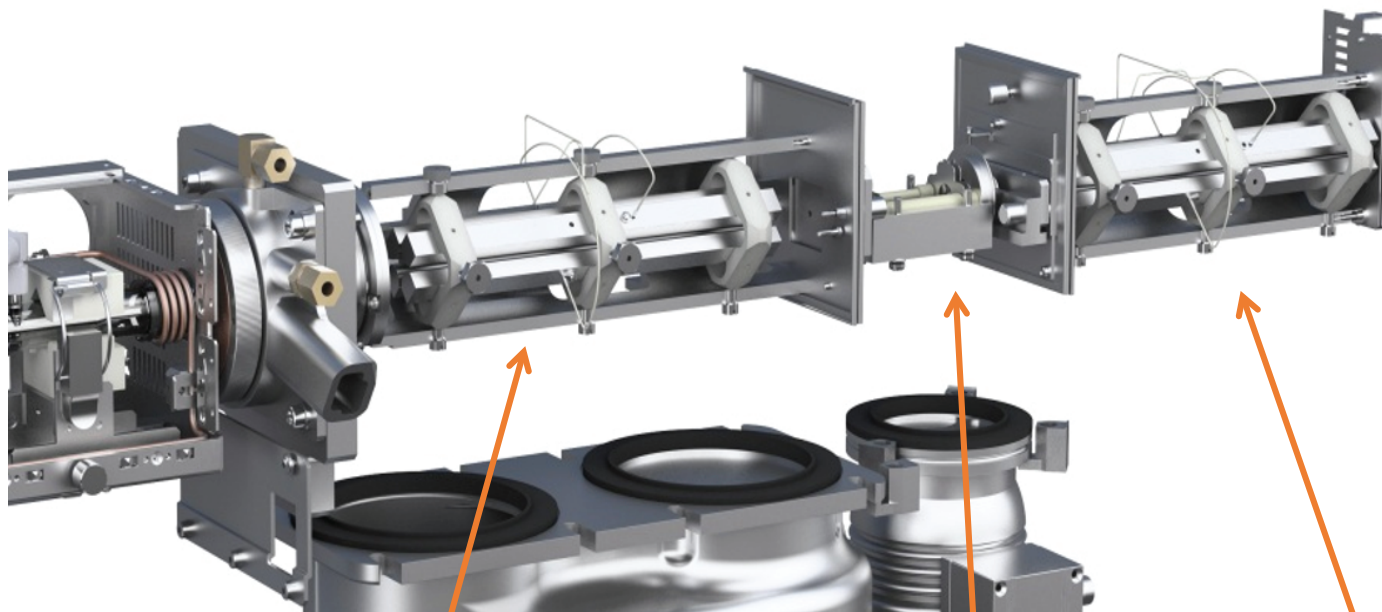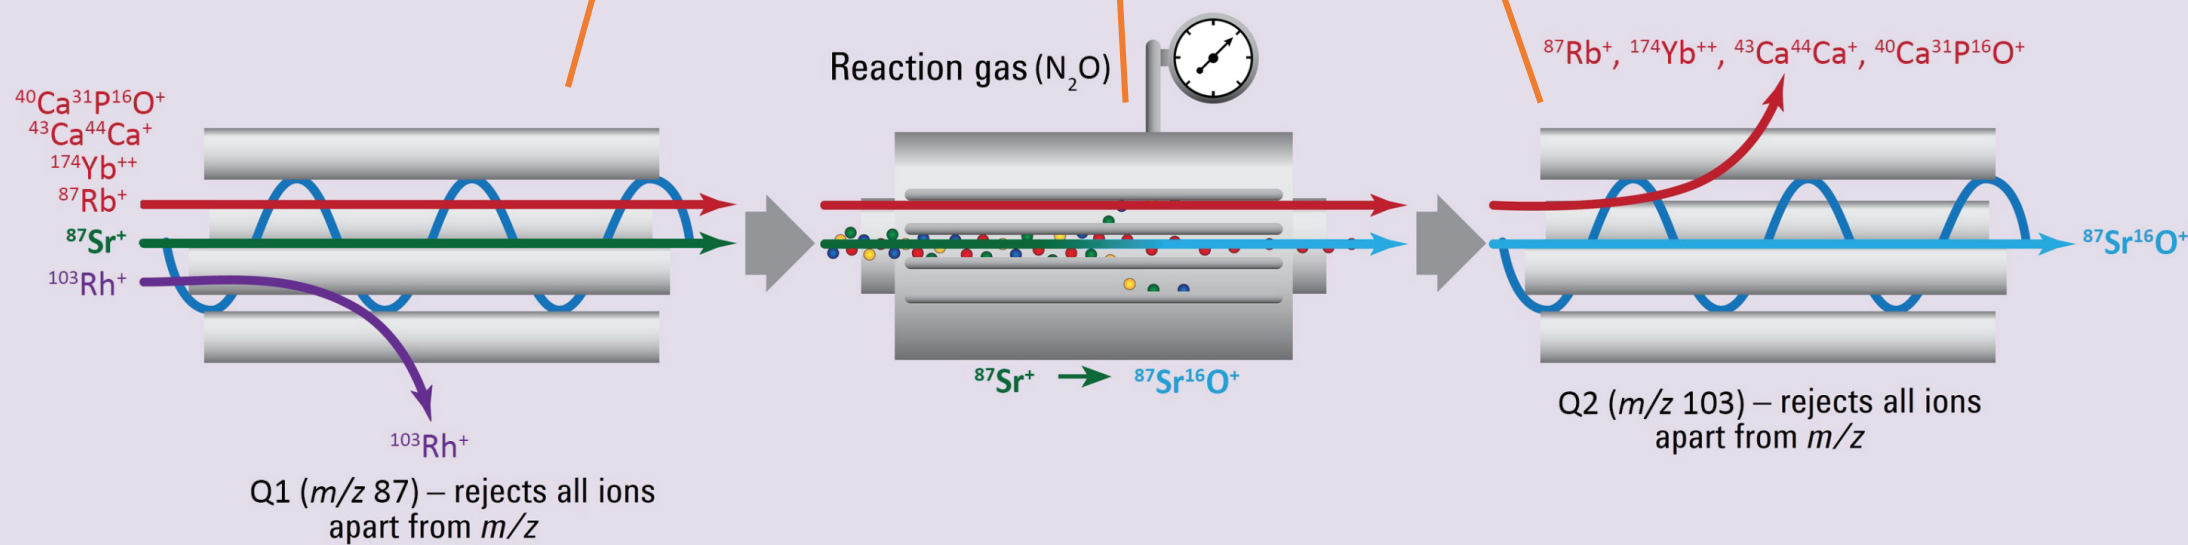

Olierook et al., Supplementary Fig. A

Supplement: Supplementary file 2 [file gchron-2020-7-supplement.zip]

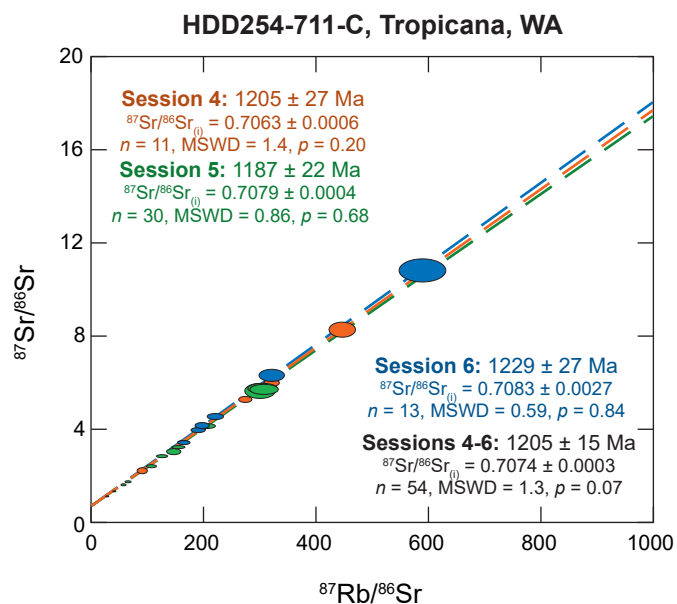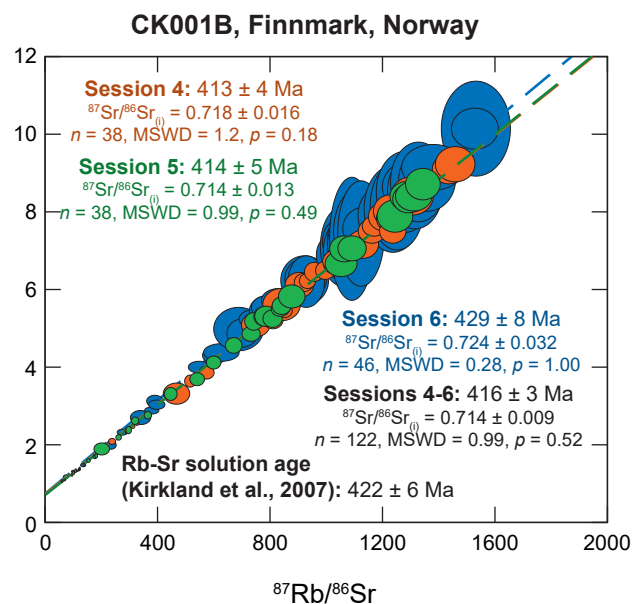

Olierook et al., Supplementary Fig. C

Supplement: Supplementary file 3 [file gchron-2020-7-supplement.zip]
